# Supplementary material for: A metallosalen-based microporous organic polymer as a heterogeneous carbon–carbon coupling catalyst
Source: Royal Society of Chemistry journal article supplement (doi:10.1039/c3ta13128a), 2013-01-01
Supplement: c3ta13128a.pdf [file c3ta13128a.pdf]

## ***Electronic Supplementary Information (ESI)***

### **A metallosalen-based microporous organic polymer as heterogeneous carbon–carbon coupling catalyst**

He Li<sup>a</sup>, Bo Xu<sup>a</sup>, Xiaoming Liu<sup>a\*</sup>, Sigen A<sup>a</sup>, Chuanyi He<sup>a</sup>, Hong Xia<sup>b</sup> and Ying Mu<sup>a\*</sup>

<sup>a</sup>State Key Laboratory for Supramolecular Structure and Materials, College of Chemistry, Jilin University, 2699 Qianjin Avenue, Changchun, 130012, P. R. China.

<sup>b</sup>State Key Laboratory on Integrated Optoelectronics, College of Electronic Science and Technology, Jilin University, 2699 Qianjin Avenue, Changchun, 130012, P.R.China.

Email: xm\_liu@jlu.edu.cn

#### **Table of Contents:**

**Section A.** Synthetic procedures of the Salen ligand and Salen-palladium monomer

**Section B.** The stability of MsMOP-1

**Section C.** The crystalline of MsMOP-1

**Section D.** The electronic adsorption spectra of MsMOP-1 and monomers

**Section E.** N<sub>2</sub> sorption isotherms and pore size distribution

**Section F.** The SEM images

**Section G.** X-ray photoelectron spectroscopy of MsMOP-1

**Section H.** Catalytic activity of MsMOP-1

**Section I.** The characterization of cross-coupling products

**Section J.** <sup>1</sup>H NMR spectra of products

**Section K.** GC-MS spectra of products

**Section L.** Supporting references

## Section A. Synthetic procedures of the Salen ligand and Salen-palladium monomer

### *Synthesis of Salen ligand*

To a solution 5-bromo-2-hydrobenzaldehyde (3.0 g, 14.9 mmol) in ethanol (40 mL) was added dropwise an ethanol solution (5 mL) of ethylenediamine (0.5 mL, 7.4 mmol) at 80 °C. The reaction mixture was stirred for 4 h at this temperature, and then the mixture was cooled to room temperature. The precipitation can be obtained by filter, further purified by washing with methanol to afford target compound (3.15 g, 95%) as a yellow solid. <sup>1</sup>H NMR (300 MHz, CDCl<sub>3</sub>): δ 3.95 (s, 4H, CH<sub>2</sub>), 6.85 (d, *J* = 9.0 Hz, 2H), 7.34 (d, *J* = 3.0 Hz, 2H), 7.37 (dd, *J* = 9.0 Hz, *J* = 3.0, 2H), 8.28 (s, 2H, CH=N), 13.15 (s, 2H, OH) ppm. <sup>13</sup>C {<sup>1</sup>H} (300 MHz, CDCl<sub>3</sub>) δ: 60.0, 110.2, 119.1, 119.9, 133.6, 135.2, 160.0, 165.3 ppm. Anal. Calcd for C<sub>16</sub>H<sub>14</sub>Br<sub>2</sub>N<sub>2</sub>O<sub>2</sub> (426.1): C, 45.10; H, 3.31; N, 6.57. Found: C, 45.18; H, 3.36; N, 6.46. FT-IR (KBr): ν 470, 648, 698, 744, 818, 945, 1079, 1133, 1171, 1308, 1374, 1414, 1455, 1521, 1590, 1628, 2961 cm<sup>-1</sup>.

### *Synthesis of palladium Salen monomer*

A solution of Pd(OAc)<sub>2</sub> (0.158 g, 0.704 mmol) in methanol (10 mL) was added to a solution of Salen ligand (0.30 g, 0.704 mmol) in chloroform (30 mL) at room temperature. Then the mixture was refluxed and stirred for 6 h. After the mixture was cooled to room temperature, the precipitate was filtered off and washed with methanol (40 mL). After drying in vacuum, palladium-salen monomer was obtained as yellow powder (3.73 g, 84.3%). <sup>1</sup>H NMR (300 MHz, *d*<sub>6</sub>-DMSO) δ: 3.83 (s, 4H, CH<sub>2</sub>), 6.78 (d, *J* = 8.0 Hz, 2H), 7.36 (dd, *J* = 9.0 Hz, *J* = 3.0 Hz, 2H), 7.57 (d, *J* = 3.0 Hz, 2H), 8.20 (s, 2H, CH=N) ppm. Anal. Calcd for C<sub>16</sub>H<sub>12</sub>Br<sub>2</sub>N<sub>2</sub>O<sub>2</sub>Pd (530.51): C, 36.22; H, 2.28; N, 5.28; Found: C, 36.25; H, 2.30; N, 5.21. IR (KBr): ν 469, 549, 618, 652, 692, 743, 817, 948, 1080, 1137, 1171, 1302, 1371, 1417, 1457, 1520, 1588, 1628, 2924 cm<sup>-1</sup>.

### Section B. The stability of MsMOP-1

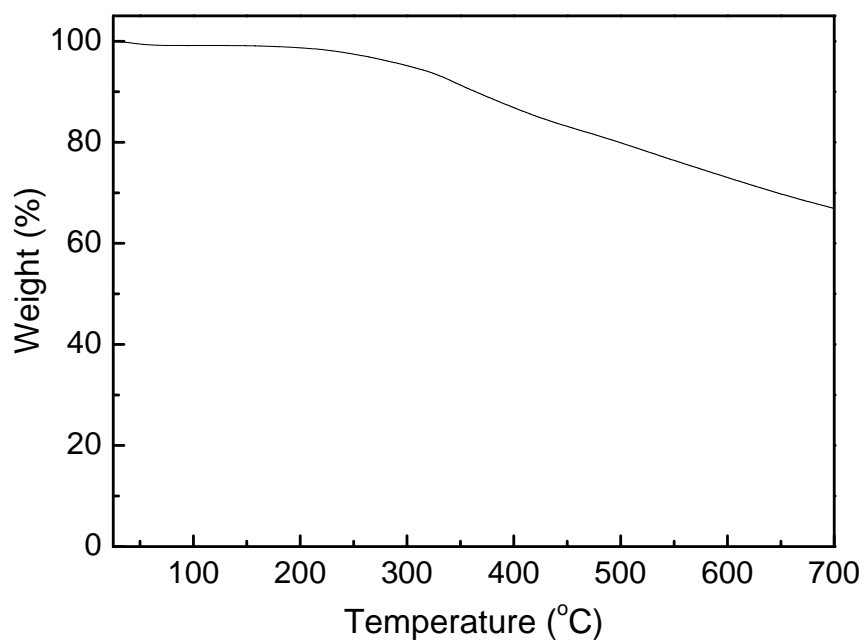

**Fig. S1** TGA curve of MsMOP-1 under nitrogen.

### Section C. The crystalline of MsMOP-1

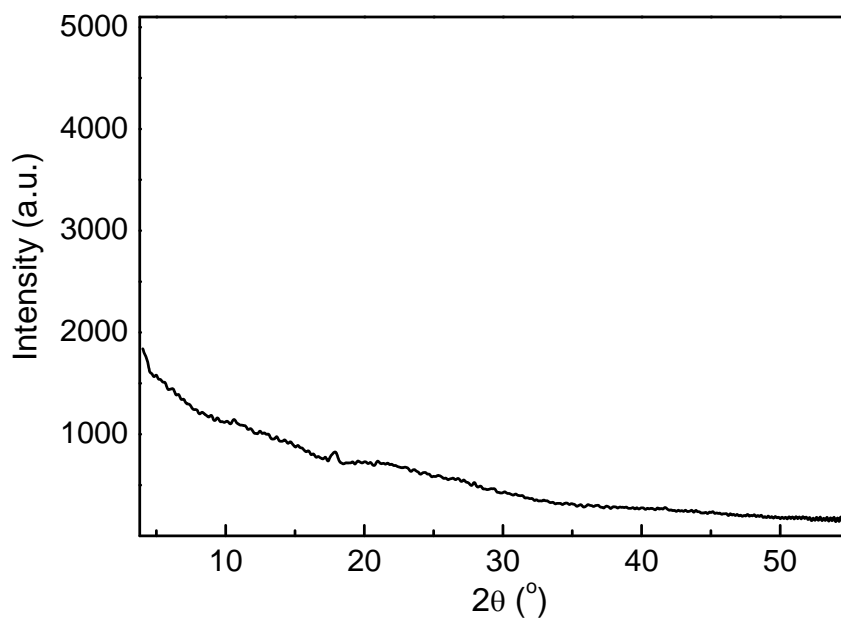

**Fig. S2** PXRD curve of MsMOP-1.

#### Section D. The electronic adsorption spectra of MsMOP-1 and monomers

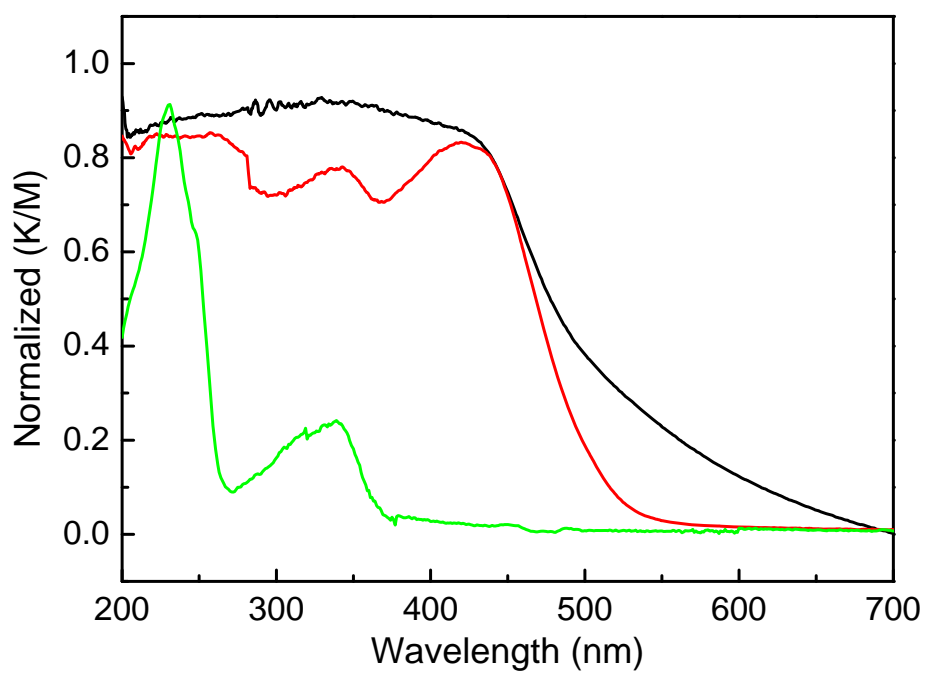

**Fig. S3** The UV-vis absorption spectra of MsMOP-1 (black line), Salen-Pd monomer (red line) and 1,3,5-triethynylbenzene (green line) powder.

### Section E. N<sub>2</sub> sorption isotherms and pore size distribution

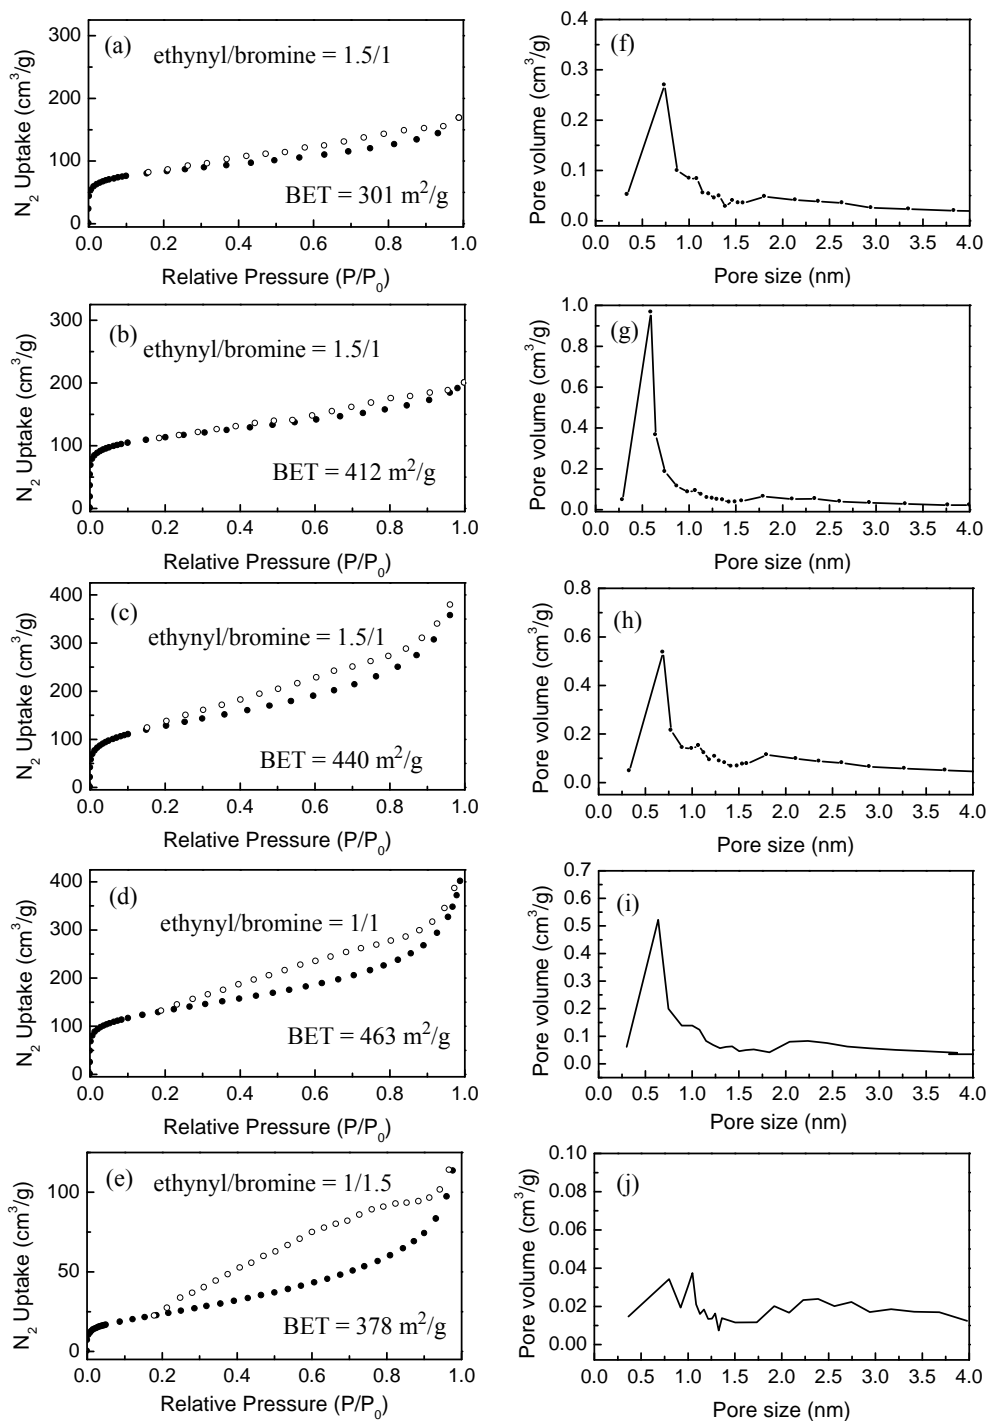

**Fig. S4** (a-e) Nitrogen adsorption (●) and desorption (○) isotherm profiles of MsMOP-1 prepared in (a) THF/TEA, (b) DMF/TEA, (c) Dioxide/TEA, and (d-e) DMAC/TEA measured at 77 K. (f-j) Pore size distribution of MsMOP-1 prepared in (f) THF/TEA, (g) DMF/TEA, (h) Dioxide/TEA, (i-j) DMAC/TEA by SF modeling on the N<sub>2</sub> adsorption isotherms.

### Section F. The SEM images

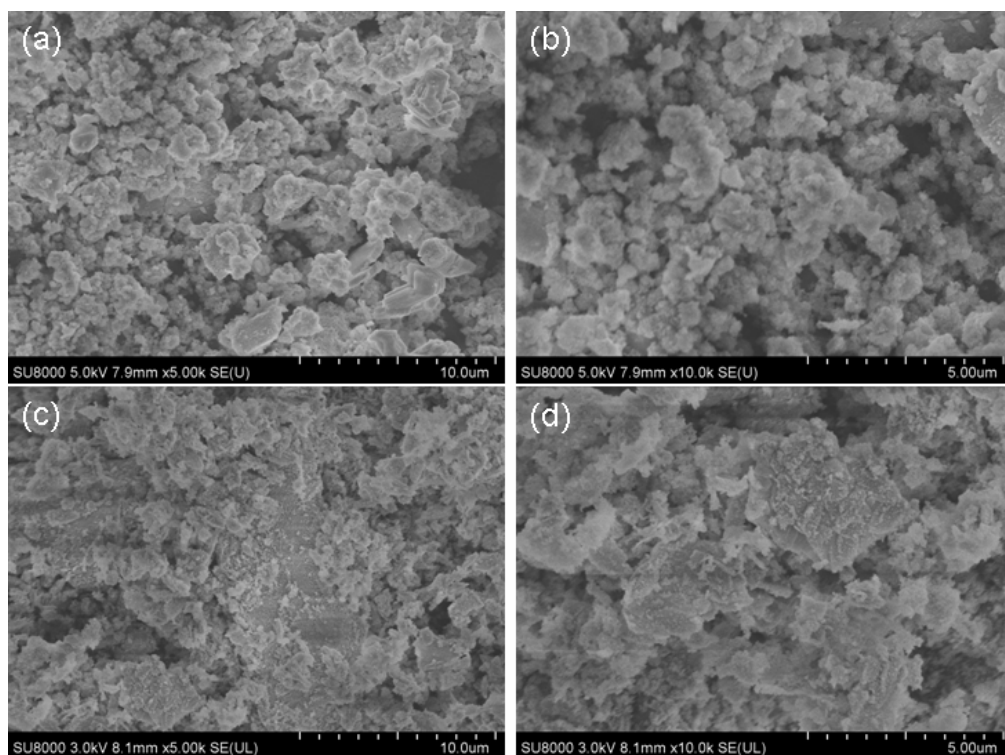

**Fig. S5** SEM images of fresh (a, b) and after the fifth run (c, d) MsMOP-1 samples.

### Section G. X-ray photoelectron spectroscopy of MsMOP-1

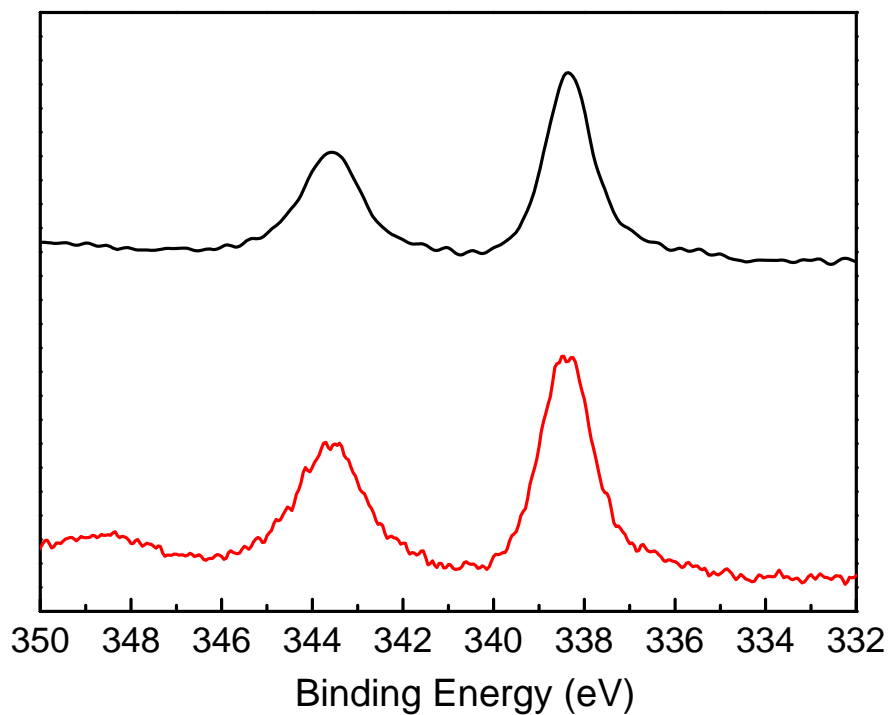

**Fig. S6** XPS spectra of MsMOP-1 samples fresh (black line) and after reaction (red line).

## Section H. Catalytic activity of MsMOP-1

**Table S1.** The Suzuki-Miyaura coupling reaction of iodobenzene with phenylboronic acid in the presence of MsMOP-1<sup>a</sup>

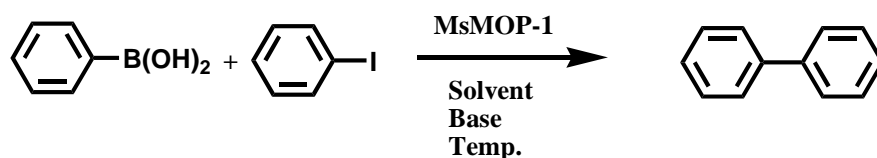

| Entry           | Solvent               | T (°C) | Base                     | Time (h) | Yield (%) <sup>b</sup> |
|-----------------|-----------------------|--------|--------------------------|----------|------------------------|
| 1               | DMF                   | 100    | $\text{K}_2\text{CO}_3$  | 1        | 31                     |
| 2               | DMAc                  | 100    | $\text{K}_2\text{CO}_3$  | 1        | 35                     |
| 3               | Toulene               | 100    | $\text{K}_2\text{CO}_3$  | 1        | 50                     |
| 4               | EtOH                  | 80     | $\text{K}_2\text{CO}_3$  | 1        | 98                     |
| 5 <sup>c</sup>  | DMF/H <sub>2</sub> O  | 100    | $\text{K}_2\text{CO}_3$  | 1        | 71                     |
| 6 <sup>d</sup>  | EtOH/H <sub>2</sub> O | 80     | $\text{K}_2\text{CO}_3$  | 1        | 99                     |
| 7 <sup>d</sup>  | EtOH/H <sub>2</sub> O | 80     | $\text{K}_2\text{CO}_3$  | 0.25     | 94                     |
| 8 <sup>d</sup>  | EtOH/H <sub>2</sub> O | 60     | $\text{K}_2\text{CO}_3$  | 0.25     | 38                     |
| 9 <sup>d</sup>  | EtOH/H <sub>2</sub> O | 60     | $\text{K}_2\text{CO}_3$  | 1        | 80                     |
| 10 <sup>d</sup> | EtOH/H <sub>2</sub> O | 60     | $\text{K}_2\text{CO}_3$  | 2        | 94                     |
| 11              | EtOH                  | 80     | $\text{Na}_2\text{CO}_3$ | 1        | 37                     |
| 12              | EtOH                  | 80     | $\text{Cs}_2\text{CO}_3$ | 1        | 95                     |
| 13              | EtOH                  | 80     | $\text{Et}_3\text{N}$    | 1        | 2                      |
| 14 <sup>e</sup> | EtOH                  | 80     | $\text{K}_2\text{CO}_3$  | 1        | 0                      |

<sup>a</sup> Reaction conditions: iodobenzene (0.5 mmol), phenylboronic acid (0.75 mmol), base (1 mmol), MsMOP-1 (1.0 mg) and solvent (3.0 mL).

<sup>b</sup> Determined by GC using undecane as internal standard.

<sup>c</sup> DMF/H<sub>2</sub>O (1.5 mL/1.5 mL).

<sup>d</sup> EtOH/H<sub>2</sub>O (1.5 mL/1.5 mL).

<sup>e</sup> In the absence of MsMOP-1.

**Table S2.** Heck coupling reaction of 4-bromobenzaldehyde with ethyl acrylate in the presence of MsMOP-1<sup>a</sup>

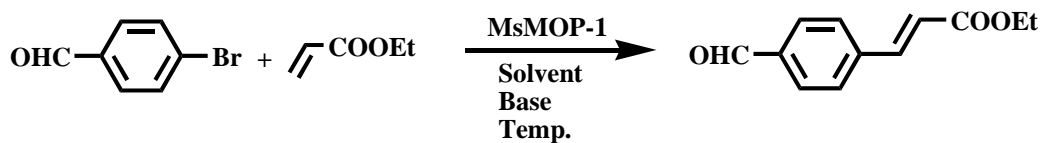

| Entry | Solvent                           | T (°C) | Base                           | Time (h) | Yield (%) <sup>b</sup> |
|-------|-----------------------------------|--------|--------------------------------|----------|------------------------|
| 1     | DMF                               | 130    | Et <sub>3</sub> N              | 3        | 74                     |
| 2     | EtOH                              | 130    | Et <sub>3</sub> N              | 3        | NR                     |
| 3     | DMSO                              | 130    | Et <sub>3</sub> N              | 3        | NR                     |
| 4     | DMF/H <sub>2</sub> O <sup>c</sup> | 130    | Et <sub>3</sub> N              | 3        | NR                     |
| 5     | DMAc                              | 130    | Et <sub>3</sub> N              | 3        | 80                     |
| 6     | DMAc                              | 130    | K <sub>2</sub> CO <sub>3</sub> | 3        | 56                     |
| 7     | DMAc                              | 130    | K <sub>3</sub> PO <sub>4</sub> | 3        | 18                     |

<sup>a</sup> Reaction conditions: 4-bromobenzaldehyde (0.5 mmol), ethyl acrylate (1.5 mmol), base (1.5 mmol), MsMOP-1 (1.0 mg) and solvent (3.0 mL).

<sup>b</sup> Determined by GC using undecane as internal standard.

<sup>c</sup> DMF/H<sub>2</sub>O (1.5 mL/1.5 mL).

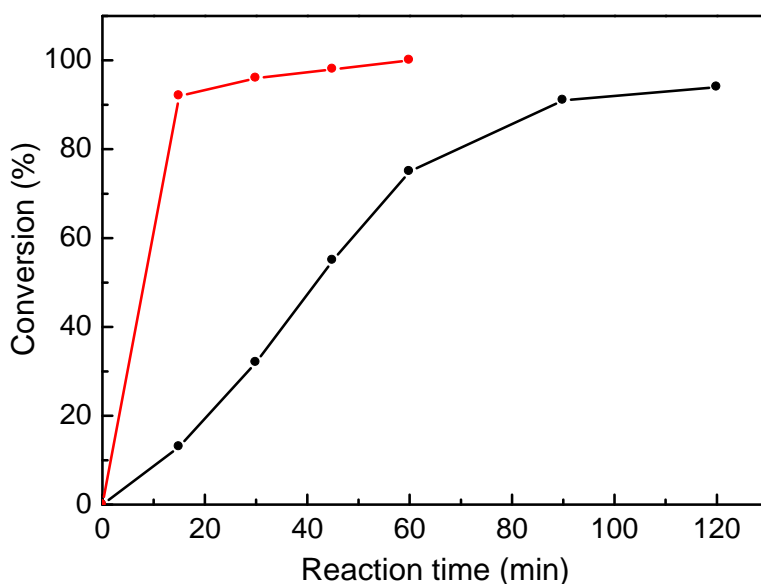

**Fig. S7** Conversion for Heck coupling reaction of iodobenzene with ethyl acrylate at 100 °C (black line) and 130 °C (red line).



### Section I. The characterization of cross-coupling products

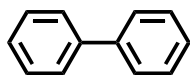

**Biphenyl:** White solid; m.p. 69-70°C (lit.,<sup>1</sup> 69°C); <sup>1</sup>H NMR (300MHz, CDCl<sub>3</sub>) δ 7.38 (t, *J* = 6.0 Hz, 2H), 7.48 (t, *J* = 6.0 Hz, 4H), 7.63 (d, *J* = 9.0 Hz, 4H) ppm. GC-MS retention time 4.30 min., *m/z* (EI) 154 (M<sup>+</sup>, 100), 76 (74), 51 (58).

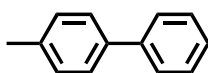

**4-Methylbiphenyl:** White solid; m.p. 86-87°C (lit.,<sup>1</sup> 87-88 °C); <sup>1</sup>H NMR (300MHz, CDCl<sub>3</sub>) δ 2.40 (s, 3H), 7.26 (d, *J* = 9.0 Hz, 2H), 7.31-7.35 (m, 1H), 7.43 (t, *J* = 9.0 Hz, 2H), 7.50 (d, *J* = 9.0 Hz, 2H), 7.58 (d, *J* = 9.0 Hz, 2H) ppm. GC-MS retention time 4.99 min., *m/z* (EI) 168 (M<sup>+</sup>, 100), 152 (28), 115 (16), 91 (13).

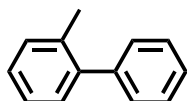

**2-Methylbiphenyl:** Colourless oil; <sup>1</sup>H NMR (300MHz, CDCl<sub>3</sub>) δ 7.24-7.28 (m, 4H), 7.31-7.37 (m, 3H), 7.40-7.45 (m, 2H) ppm. GC-MS retention time 4.39 min., *m/z* (EI) 168 (M<sup>+</sup>, 100), 153 (46), 115 (20), 83 (32).

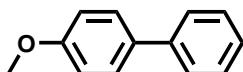

**4-Methoxybiphenyl:** White solid; m.p. 85-86°C (lit.,<sup>1</sup> 87-88 °C); <sup>1</sup>H NMR (300MHz, CDCl<sub>3</sub>) δ 3.86 (s, 3H), 6.99 (d, *J* = 9.0 Hz, 2H), 7.30 (m, 1H), 7.42 (t, *J* = 9.0 Hz, 2H), 7.54 (d, *J* = 9.0 Hz, 2H), 7.56 (d, *J* = 9.0 Hz, 2H) ppm. GC-MS retention time 5.78 min., *m/z* (EI) 184 (M<sup>+</sup>, 49), 169 (31), 141 (47), 115 (100), 89 (26), 76 (31).

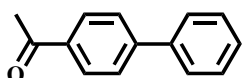

**4-Acetylbiphenyl:** White solid; m.p. 120-122°C (lit.,<sup>2</sup> 121-123 °C); <sup>1</sup>H NMR (300MHz, CDCl<sub>3</sub>) δ 2.40 (s, 3H), 7.40 (t, *J* = 9.0 Hz, 1H), 7.48 (t, *J* = 9.0 Hz, 2H), 7.64 (d, *J* = 9.0 Hz, 2H), 7.70 (d, *J* = 9.0 Hz, 2H), 8.04 (d, *J* = 9.0 Hz, 2H) ppm. GC-MS retention time 6.50 min., *m/z* (EI) 196 (M<sup>+</sup>, 45), 169 (31), 181 (100), 152 (99).

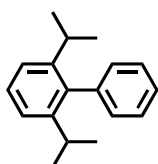

**2,6-Diisopropylbiphenyl:** Colourless oil; <sup>1</sup>H NMR (300MHz, CDCl<sub>3</sub>) δ 1.08 (d, *J* = 9.0 Hz, 12H),

2.60 (sept, 2H,  $CH(CH_3)_2$ ), 7.15-7.25 (m, 4H), 7.32-7.41 (m, 4H). GC-MS retention time 5.60 min.,  $m/z$  (EI) 238 ( $M^+$ , 48), 223 (20), 181 (100), 165 (29), 89 (15).

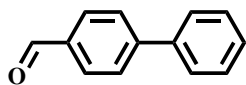

**4-biphenylbenzaldehyde:** White solid; m.p. 119-121°C (lit.,<sup>1</sup> 121 °C);  $^1H$  NMR (300MHz,  $CDCl_3$ )  $\delta$  7.42 (t,  $J = 9.0$  Hz, 1H), 7.49 (t,  $J = 6.0$  Hz, 2H), 7.64 (d,  $J = 9.0$  Hz, 2H), 7.76 (d,  $J = 9.0$  Hz, 2H), 7.96 (d,  $J = 9.0$  Hz, 2H), 10.06 (s, 1H) ppm. GC-MS retention time 6.06 min.,  $m/z$  (EI) 182 ( $M^+$ , 49), 152 (57), 76 (100).

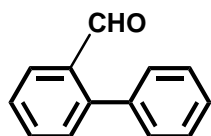

**2-biphenylbenzaldehyde:** Yellow oil;  $^1H$  NMR (300MHz,  $CDCl_3$ )  $\delta$  7.37-7.40 (m, 1H), 7.44-7.53 (m, 5H), 7.65 (td,  $J = 7.5, 1.5$ Hz, 1H), 8.04 (dd,  $J = 9.0, 1.5$ Hz, 1H), 9.99 (s, 1H) ppm. GC-MS retention time 5.64 min.,  $m/z$  (EI) 182 ( $M^+$ , 100), 152 (89), 76 (99).

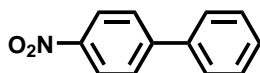

**4-Nitrobiphenyl:** Yellow solid; m.p. 113-114°C (lit.,<sup>1</sup> 114 °C);  $^1H$  NMR (300MHz,  $CDCl_3$ )  $\delta$  7.45 (m, 1H), 7.51 (m, 2H), 7.64 (d,  $J = 9.0$  Hz, 2H), 7.74 (d,  $J = 9.0$  Hz, 2H), 8.31 (d,  $J = 9.0$  Hz, 2H) ppm. GC-MS retention time 6.64 min.,  $m/z$  (EI) 199 ( $M^+$ , 54), 152 (100), 141 (51), 115 (61), 76 (84).

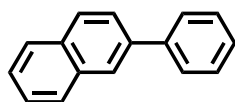

**2-phenylnaphthalene:** White solid; m.p. 95-96°C (lit.,<sup>1</sup> 96-97 °C);  $^1H$  NMR (300MHz,  $CDCl_3$ )  $\delta$  7.36-7.41 (m, 1H), 7.47-7.52 (m, 4H), 7.72-7.77 (m, 3H), 7.86-7.94 (m, 3H), 8.05 (s, 1H) ppm. GC-MS retention time 7.12 min.,  $m/z$  (EI) 204 ( $M^+$ , 100), 101 (68), 89 (38), 76 (43).

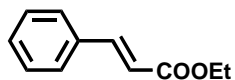

**(E)-ethyl cinnamate:** Colourless oil;  $^1H$  NMR (300MHz,  $CDCl_3$ ):  $\delta$  1.34 (t, 3H,  $CH_2CH_3$ ), 4.27 (q, 2H,  $CH_2CH_3$ ), 6.44 (d,  $J = 15$  Hz, 1H), 7.38 (m, 3H), 7.53 (m, 2H), 7.69 (d,  $J = 15$  Hz, 1H) ppm; GC-MS retention time 4.76 min.,  $m/z$  (EI) 176 ( $M^+$ , 27), 147 (17), 131 (100), 103 (88), 77 (80).

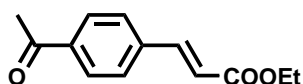

**(E)-ethyl 3-(4-acetophenyl) acrylate:** White solid; m.p. 43-45°C (lit.,<sup>3</sup> 44-46 °C); <sup>1</sup>H NMR (300MHz, CDCl<sub>3</sub>): δ 1.35 (t, 3H, CH<sub>2</sub>CH<sub>3</sub>), 2.62 (s, 3H, OCH<sub>3</sub>), 4.29 (q, 2H, CH<sub>2</sub>CH<sub>3</sub>), 6.53 (d, *J* = 15 Hz, 1H), 7.62 (d, *J* = 9.0 Hz, 2H), 7.71 (d, *J* = 15 Hz, 1H), 7.98 (d, *J* = 9.0 Hz, 2H) ppm; GC-MS retention time 6.64 min., m/z (EI) 218 (M<sup>+</sup>, 37), 203 (100), 175 (31), 131 (23), 102 (42), 91 (25).

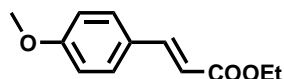

**(E)-ethyl 3-(4-methoxyphenyl) acrylate:** Colourless oil; <sup>1</sup>H NMR (300MHz, CDCl<sub>3</sub>): δ 1.33 (t, 3H, CH<sub>2</sub>CH<sub>3</sub>), 3.83 (s, 3H, OCH<sub>3</sub>), 4.25 (q, 2H, CH<sub>2</sub>CH<sub>3</sub>), 6.31 (d, *J* = 15 Hz, 1H), 6.90 (d, *J* = 9.0 Hz, 2H), 7.48 (d, *J* = 9.0 Hz, 2H), 7.65 (d, *J* = 15 Hz, 1H) ppm. GC-MS retention time 6.16 min., m/z (EI) 206 (M<sup>+</sup>, 53), 161 (100), 134 (67), 89 (42), 77 (37).

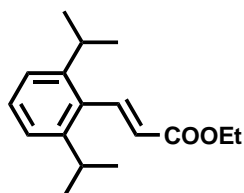

**(E)-ethyl 3-(2,6-diisopropylphenyl) acrylate:** Colourless oil; <sup>1</sup>H NMR (300MHz, CDCl<sub>3</sub>): δ 1.19 (d, 12H, CH(CH<sub>3</sub>)<sub>2</sub>), 1.36 (t, 3H, CH<sub>2</sub>CH<sub>3</sub>), 3.10 (sept, 2H, CH(CH<sub>3</sub>)<sub>2</sub>), 4.29 (q, 2H, CH<sub>2</sub>CH<sub>3</sub>), 5.93 (d, *J* = 15 Hz, 1H), 7.17 (d, *J* = 9.0 Hz, 2H), 7.29 (t, *J* = 9.0 Hz, 1H), 7.94 (d, *J* = 15 Hz, 1H) ppm. GC-MS retention time 6.93 min., m/z (EI) 260 (M<sup>+</sup>, 6), 143 (84), 129 (100), 115 (76), 91 (61).

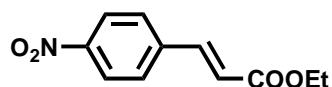

**(E)-ethyl 3-(4-nitrophenyl) acrylate:** Yellow solid; m.p. 133-135 °C (lit.,<sup>4</sup> 135 °C); <sup>1</sup>H NMR (300MHz, CDCl<sub>3</sub>): δ 1.35 (t, 3H, CH<sub>2</sub>CH<sub>3</sub>), 4.30 (q, 2H, CH<sub>2</sub>CH<sub>3</sub>), 6.55 (d, *J* = 15 Hz, 1H), 7.68 (d, *J* = 9.0 Hz, 2H), 7.73 (d, *J* = 15 Hz, 1H), 8.26 (d, *J* = 9.0 Hz, 2H) ppm. GC-MS retention time 6.72 min., m/z (EI) 221 (M<sup>+</sup>, 9), 176 (45), 130 (38), 102 (100), 90 (46).

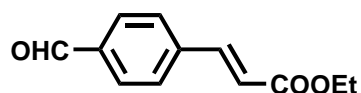

**(E)-ethyl 3-(4-formylphenyl) acrylate:** Yellow solid; m.p. 39-40 °C (lit.,<sup>5</sup> 39.4-40.1 °C); <sup>1</sup>H NMR (300MHz, CDCl<sub>3</sub>): δ 1.36 (t, 3H, CH<sub>2</sub>CH<sub>3</sub>), 4.29 (q, 2H, CH<sub>2</sub>CH<sub>3</sub>), 6.56 (d, *J* = 15 Hz, 1H), 7.67-7.74 (m, 3H), 7.91 (d, *J* = 9.0 Hz, 2H), 10.04 (s, 1H) ppm. GC-MS retention time 6.40 min., m/z (EI) 204 (M<sup>+</sup>, 31), 176 (26), 159 (52), 131 (56), 103 (100), 77 (72).

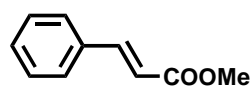

**(E)-methyl cinnamate:** White solid; m.p. 35-36 °C (lit.,<sup>6</sup> 35.8-36.5 °C); <sup>1</sup>H NMR (300MHz, CDCl<sub>3</sub>): δ 3.81 (s, 3H, OCH<sub>3</sub>), 6.45 (d, *J* = 15 Hz, 1H), 7.39 (m, 3H), 7.52 (m, 2H), 7.71 (d, *J* = 15 Hz, 1H) ppm. GC-MS retention time 4.26 min., m/z (EI) 162 (M<sup>+</sup>, 42), 131 (91), 103 (100), 77 (83).

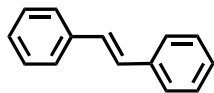

**(E)-Trans-stilbene:** White solid; m.p. 122-123 °C (lit.,<sup>5</sup> 123.9-124.6 °C); <sup>1</sup>H NMR (300MHz, CDCl<sub>3</sub>): δ 7.11 (s, 2H), 7.23-7.29 (m, 2H), 7.33-7.39 (m, 4H). 7.53 (d, *J* = 9.0 Hz, 4H) ppm. GC-MS retention time 6.04 min., m/z (EI) 180 (M<sup>+</sup>, 100), 165 (56), 89 (67), 76 (60).

## Section J. $^1\text{H}$ NMR spectra of products

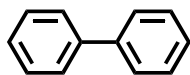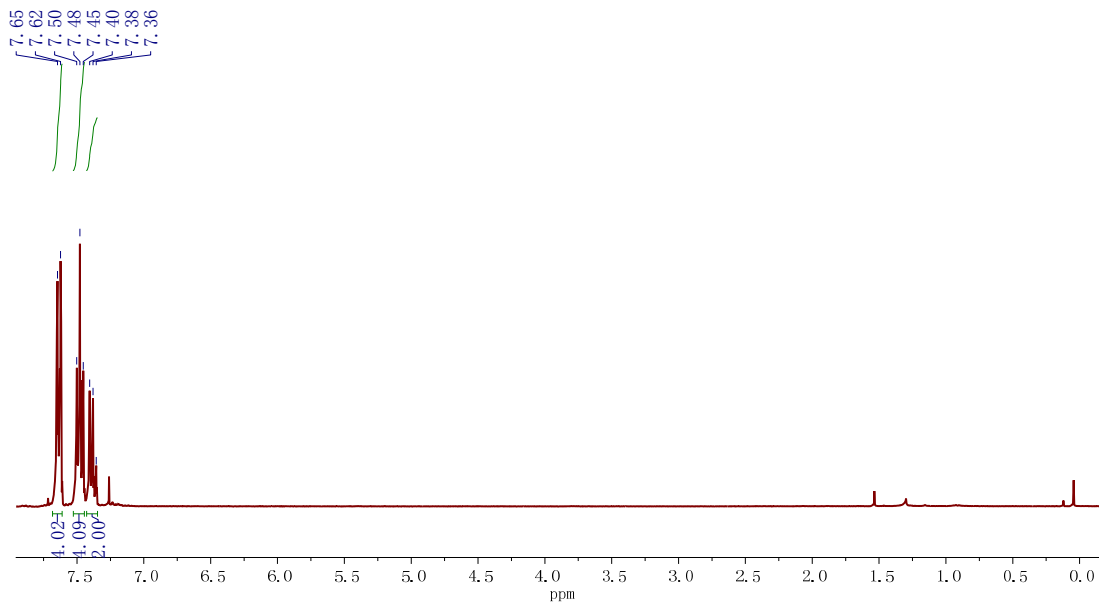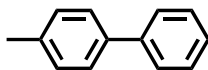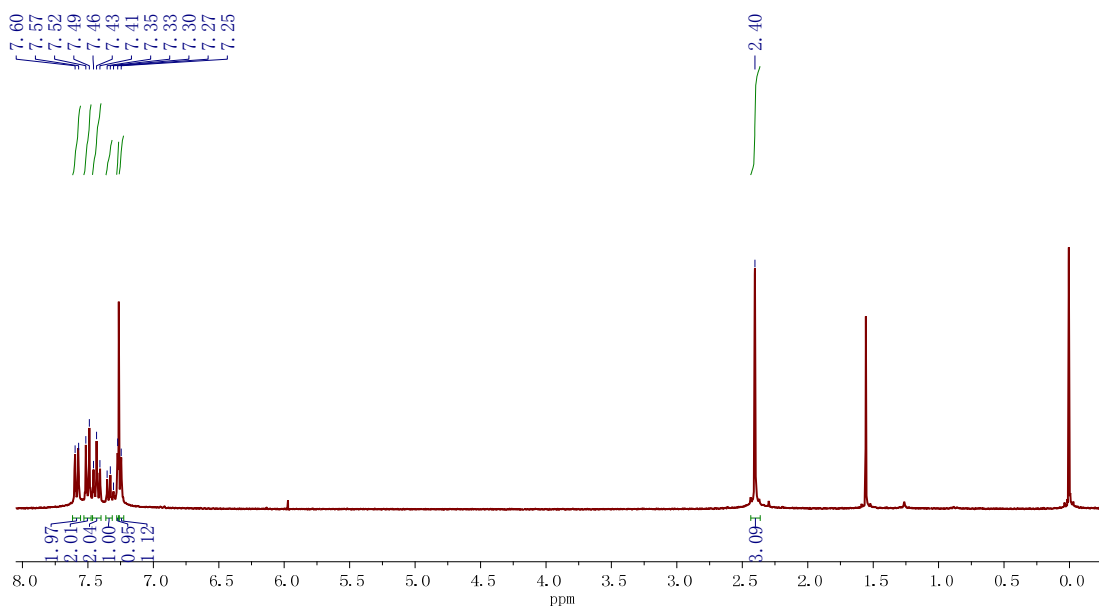

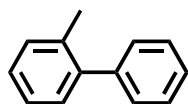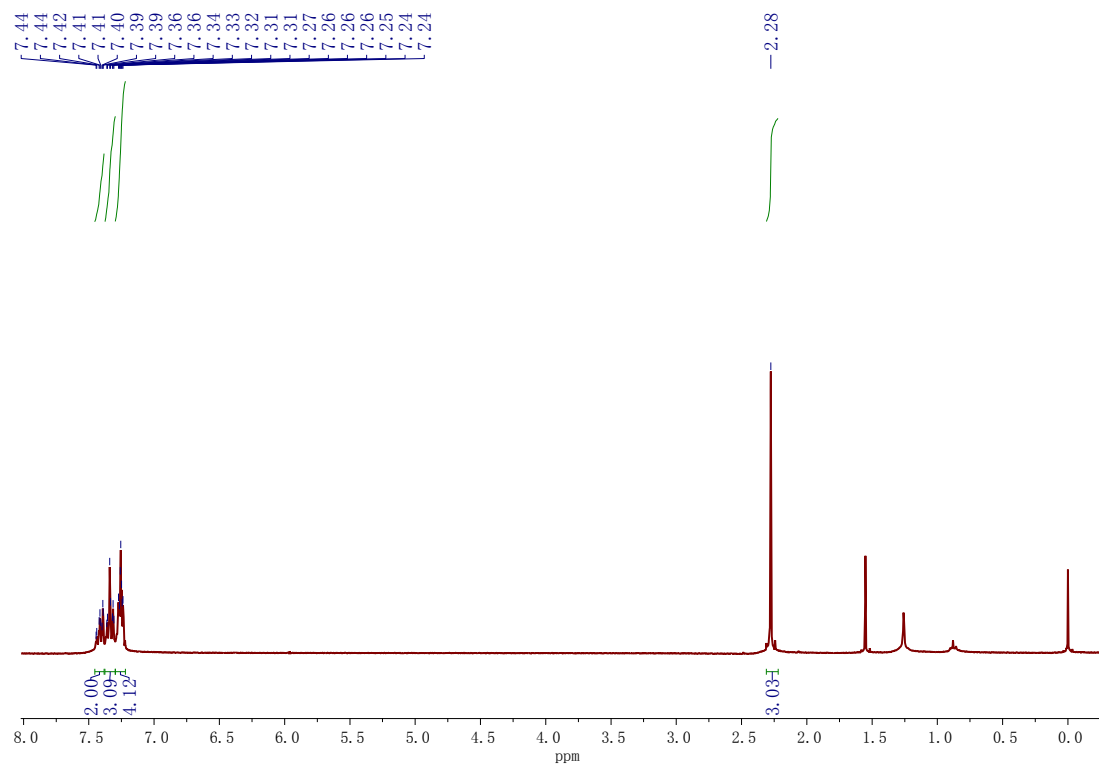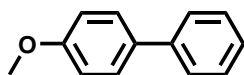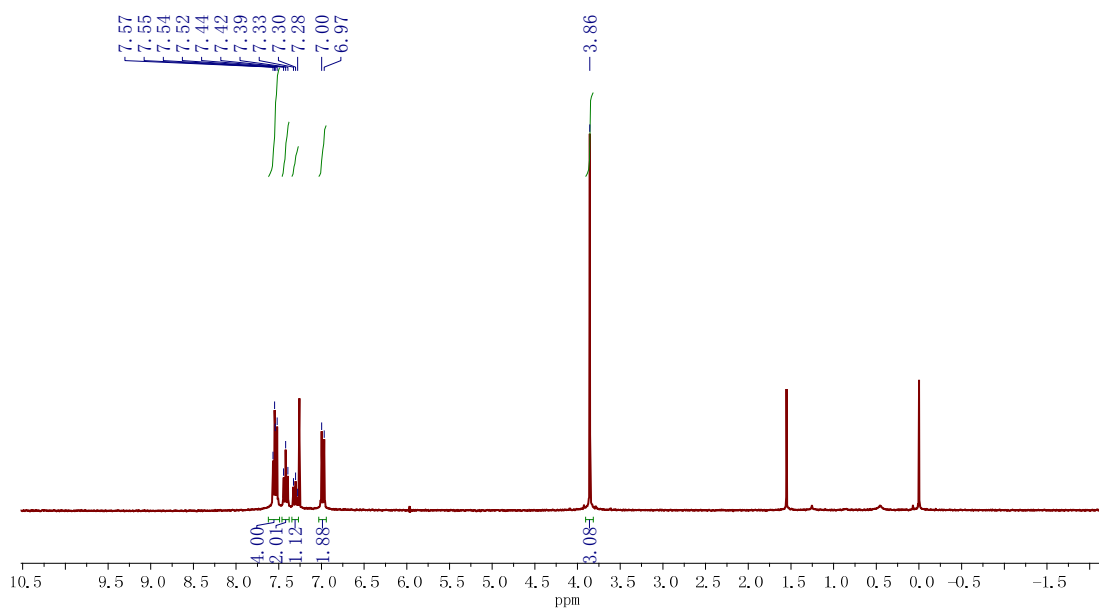

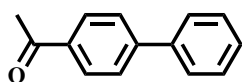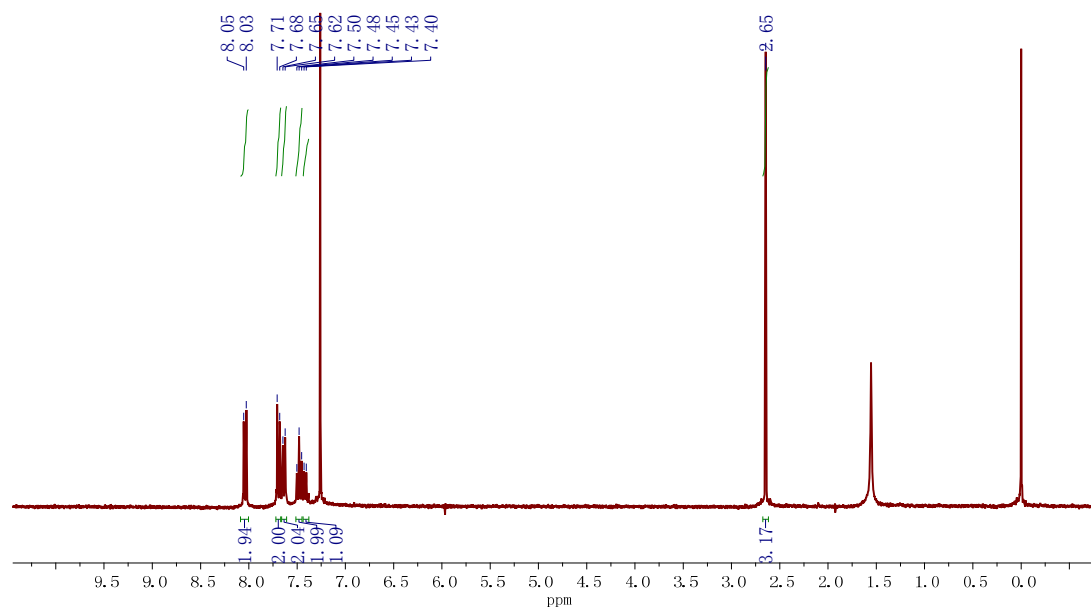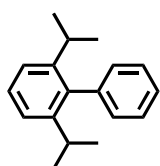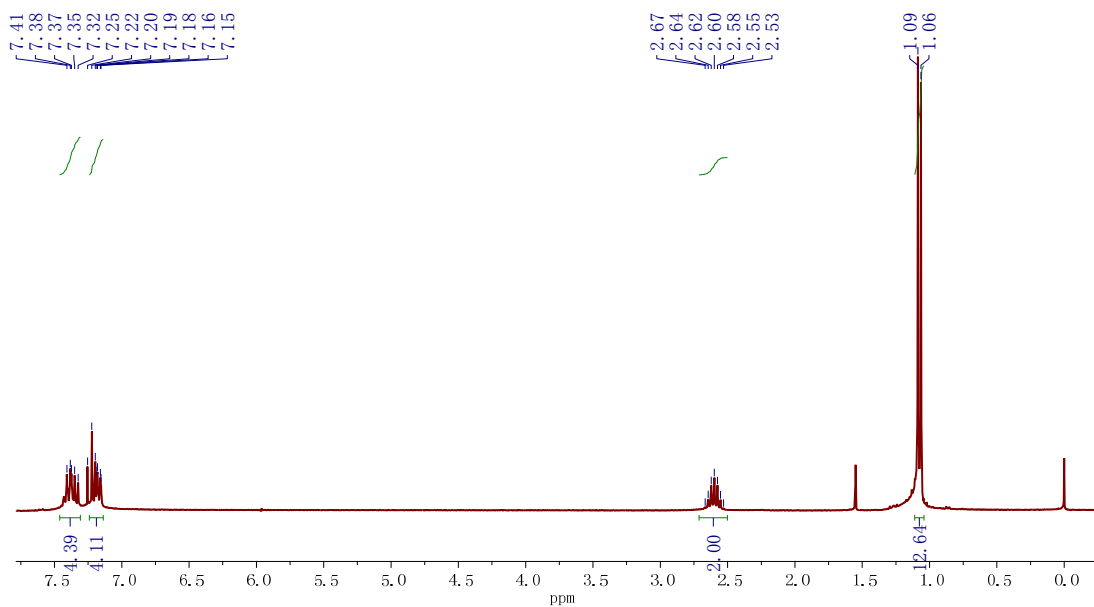

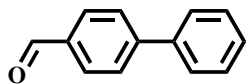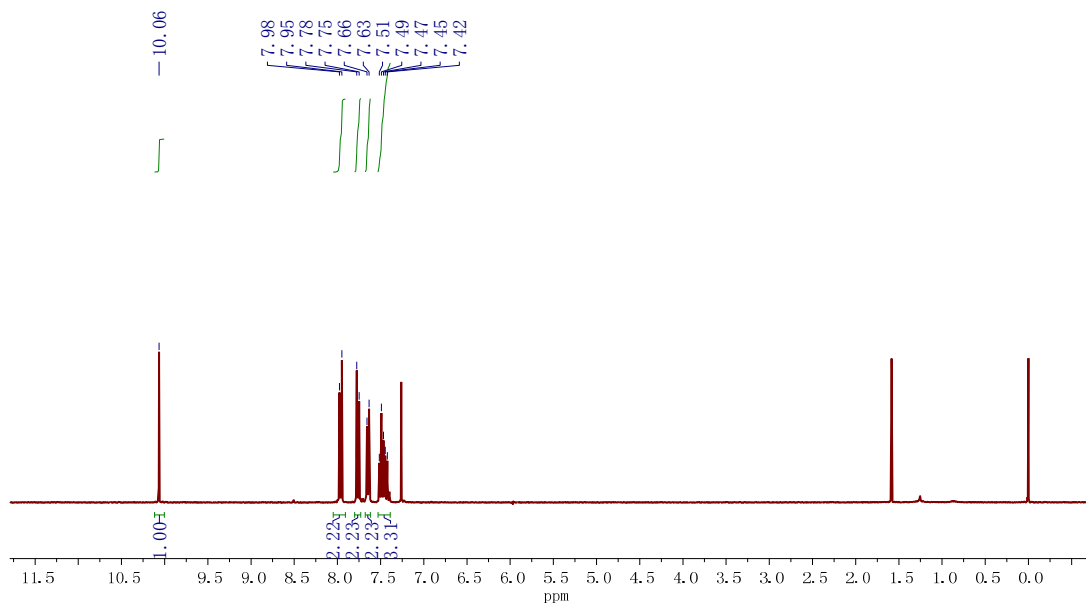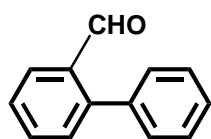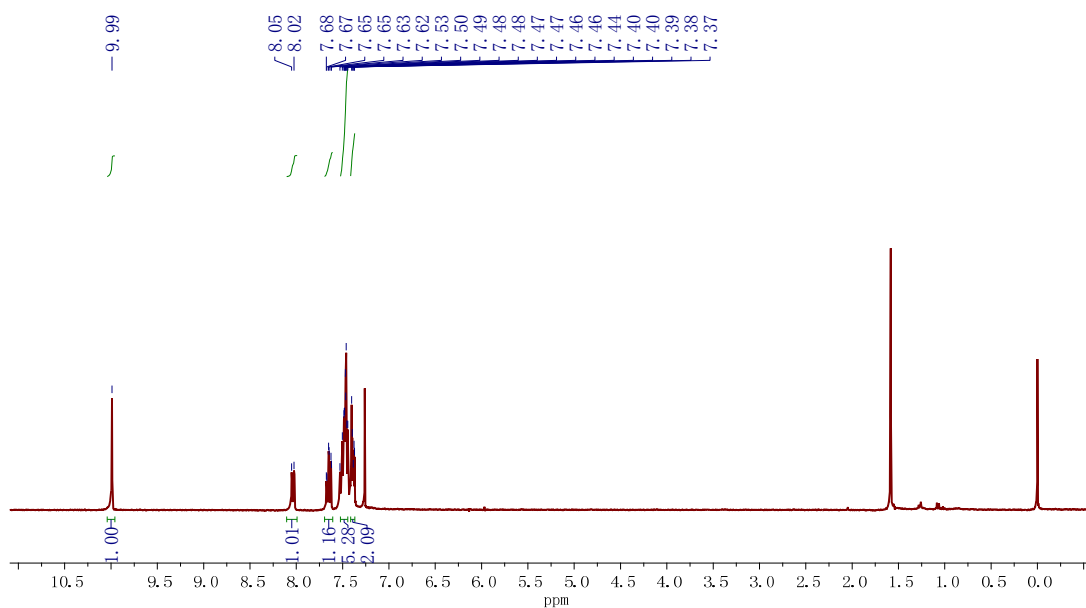



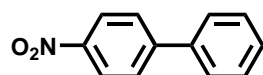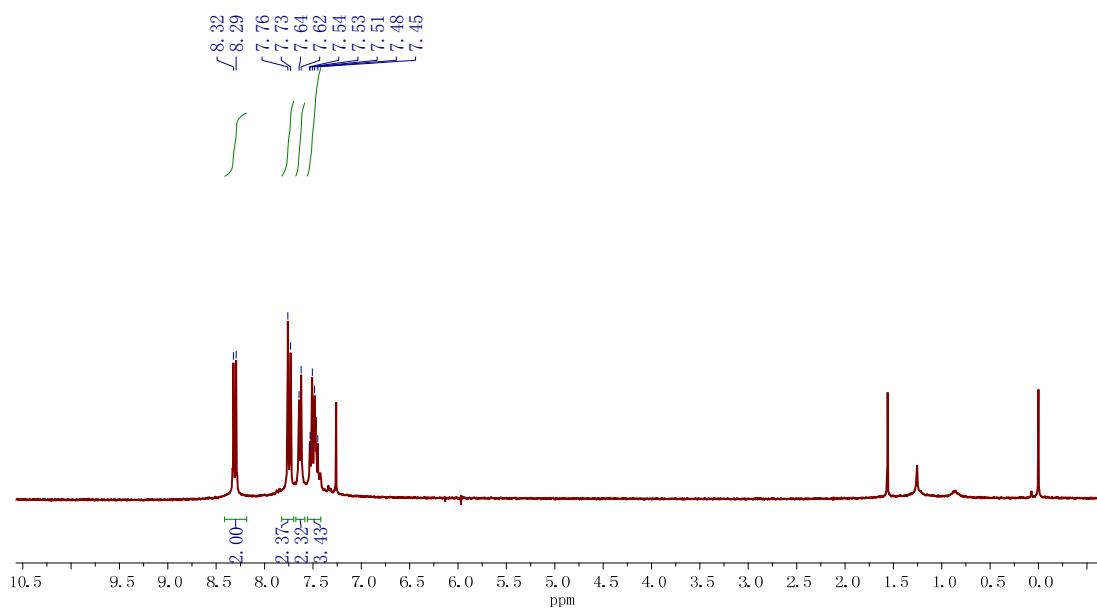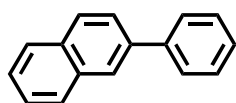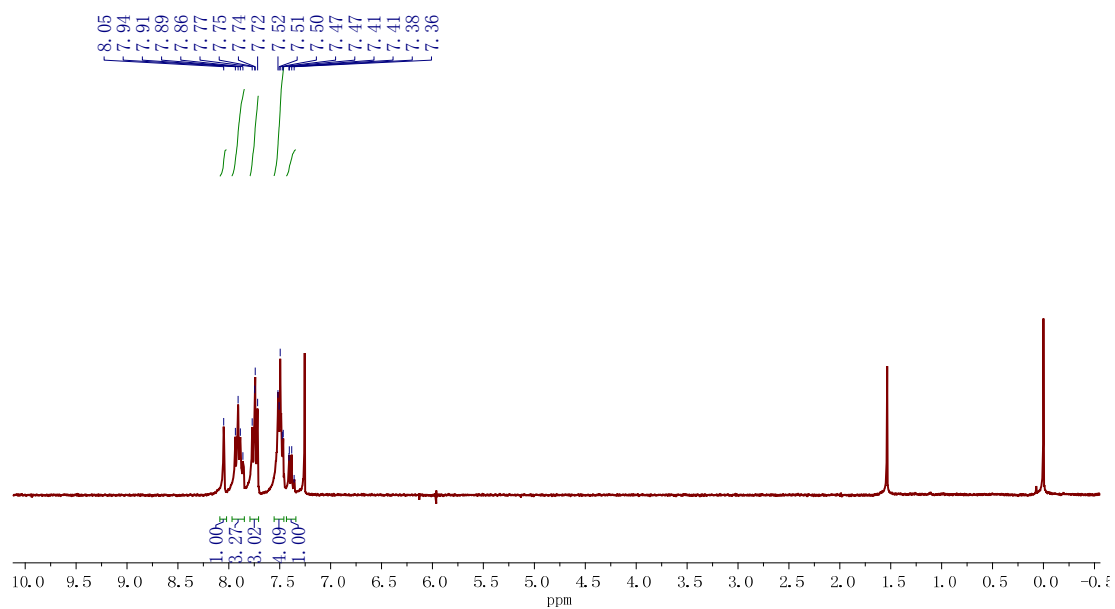

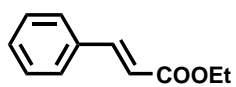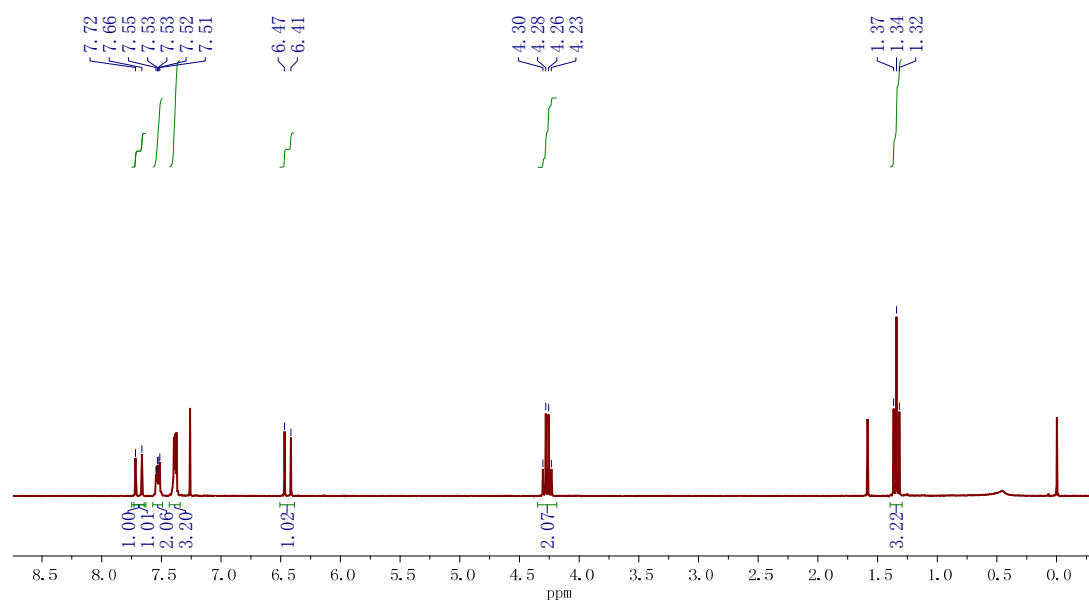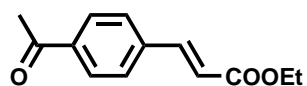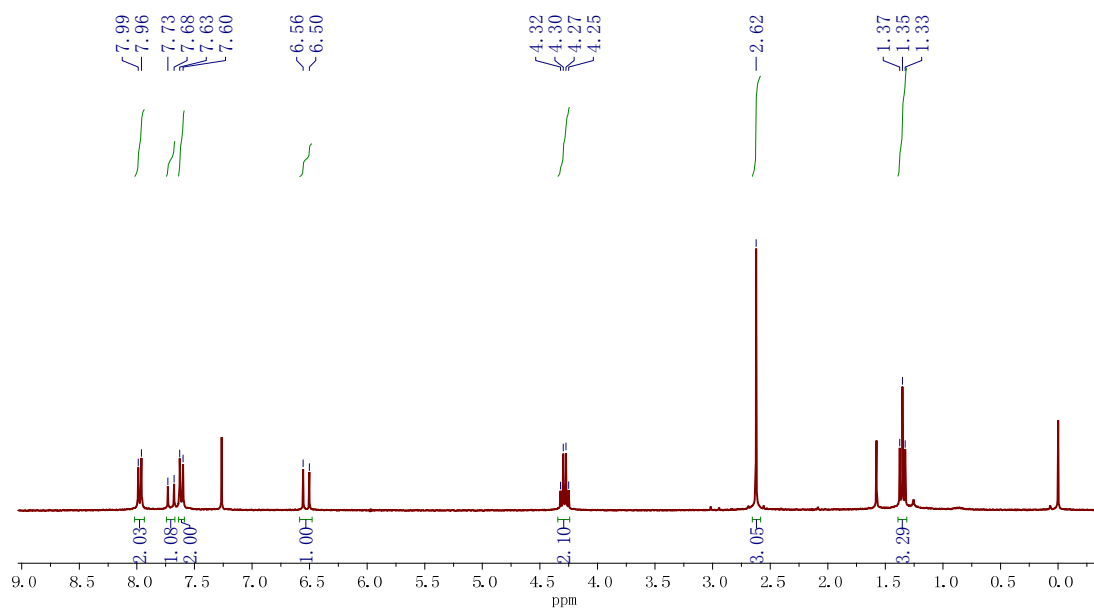

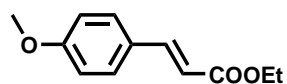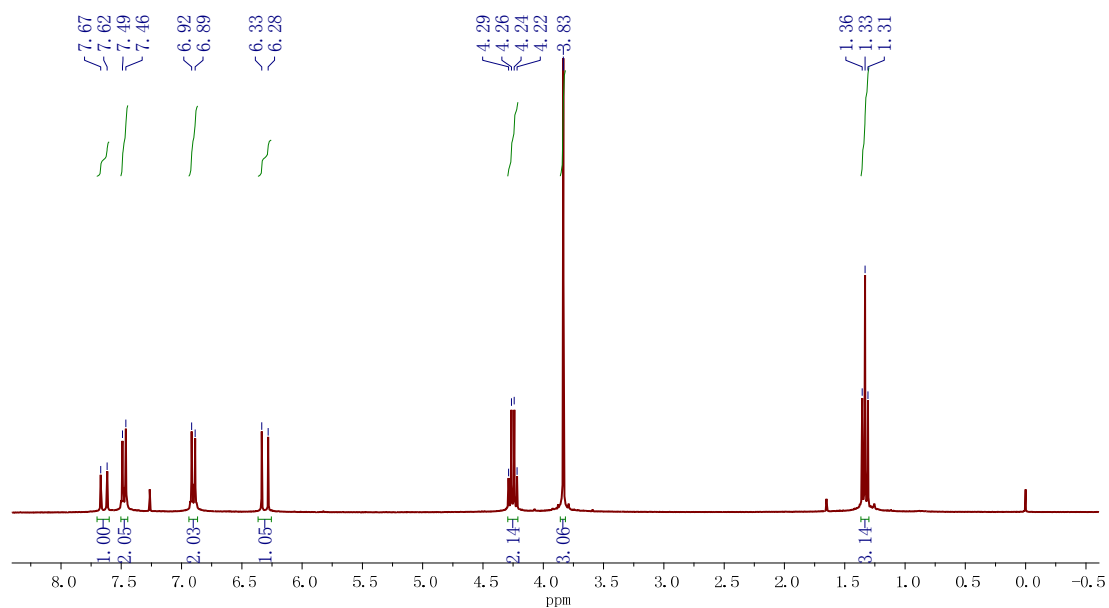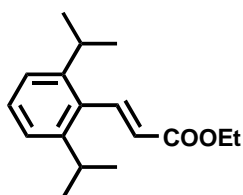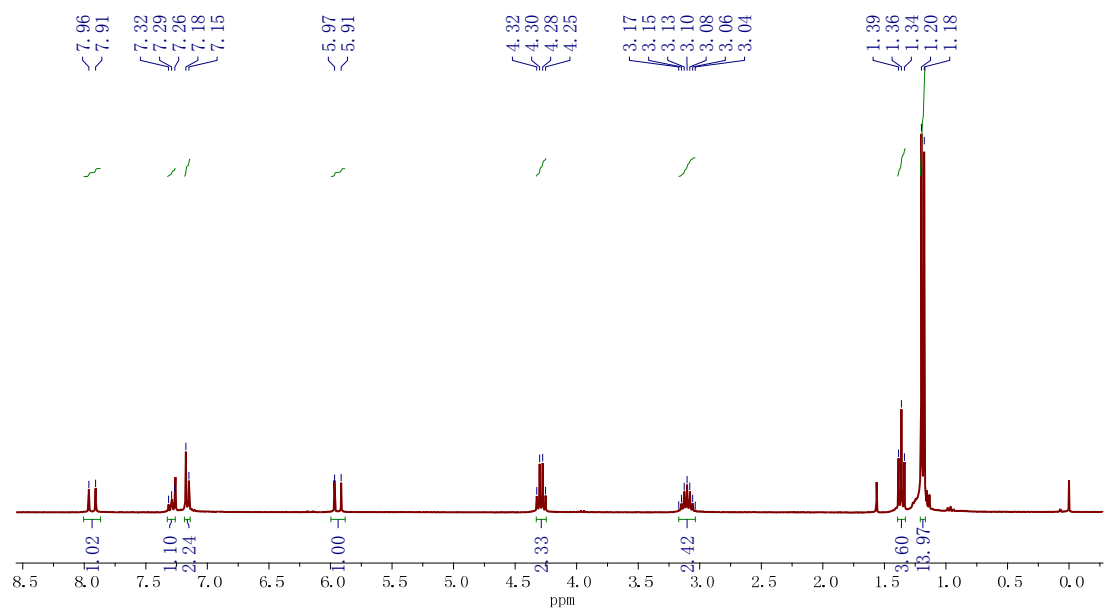

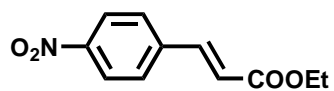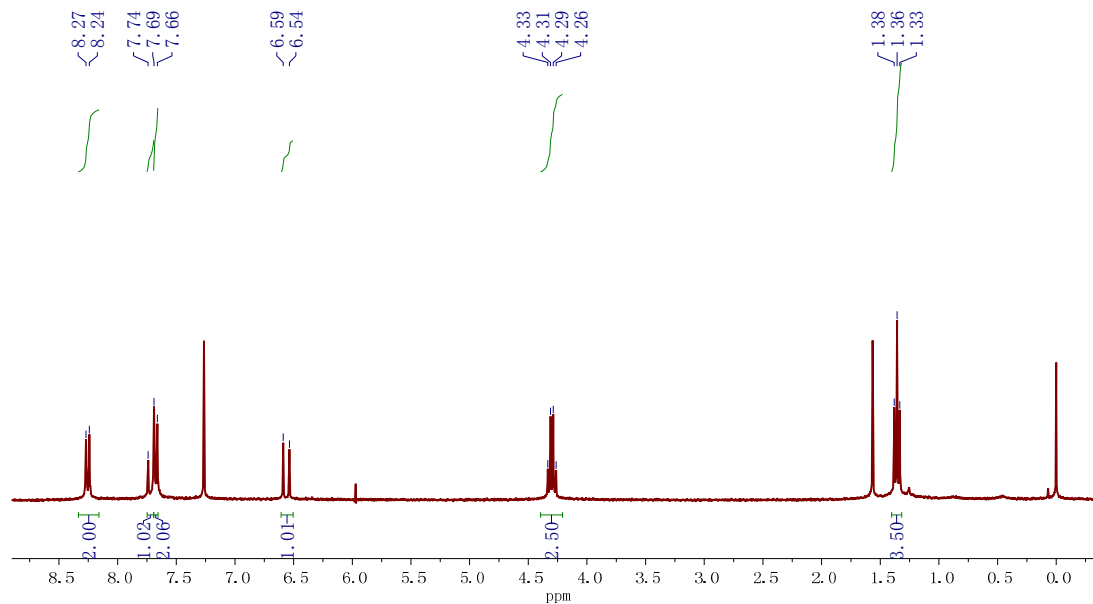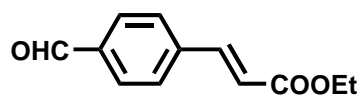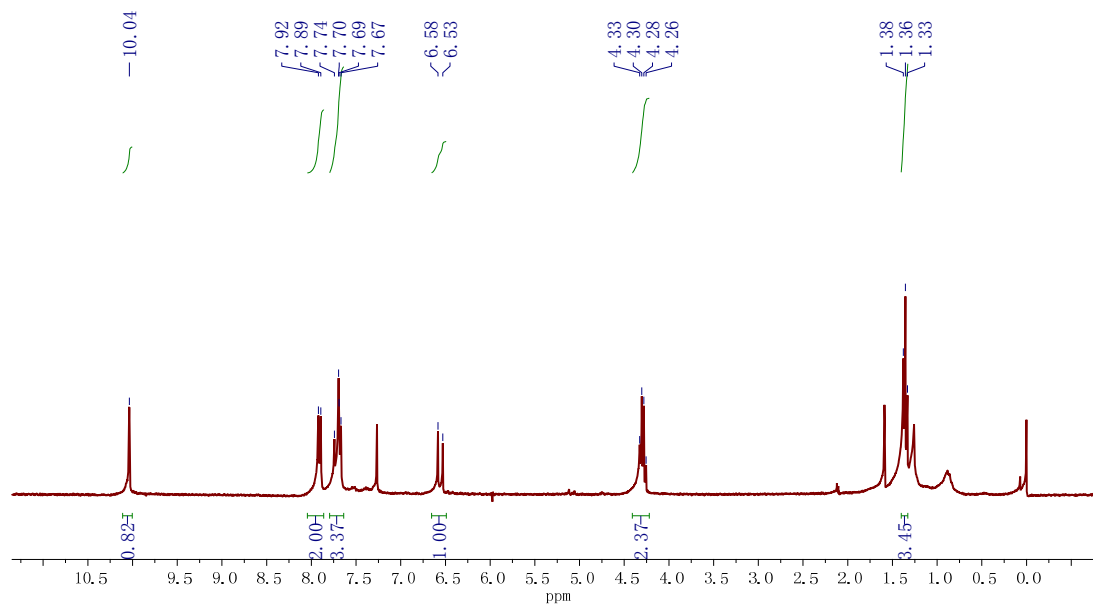

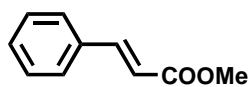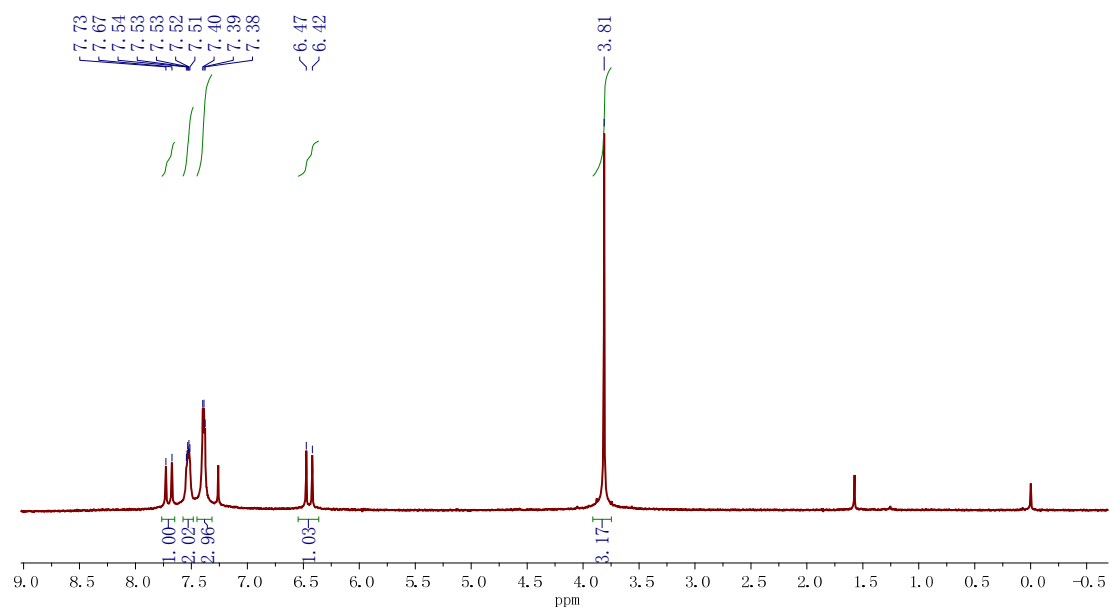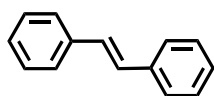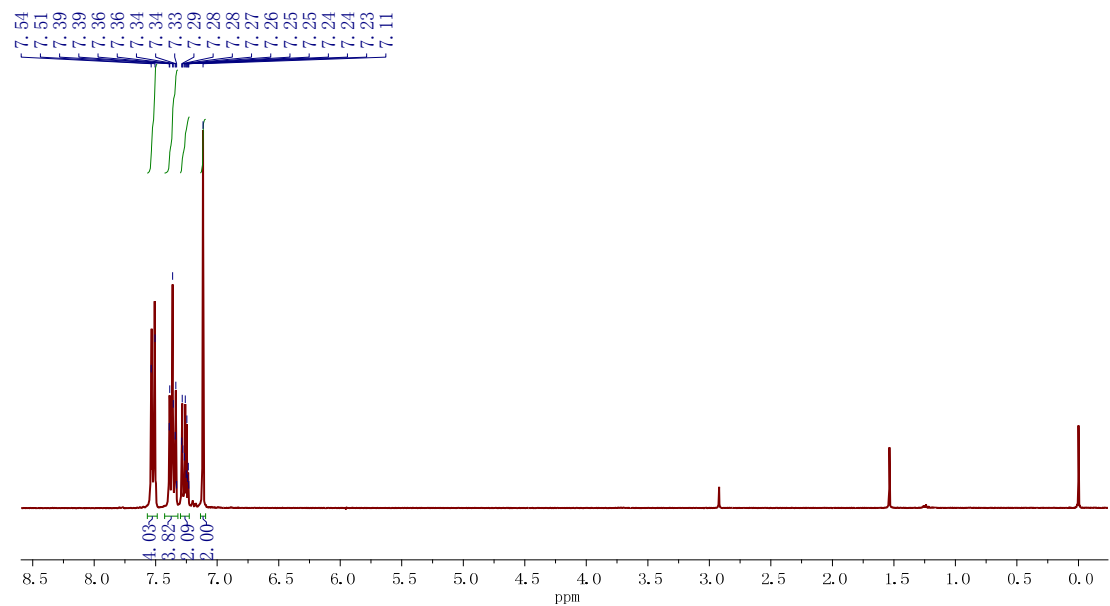

### Section K. GC-MS spectra of products

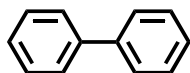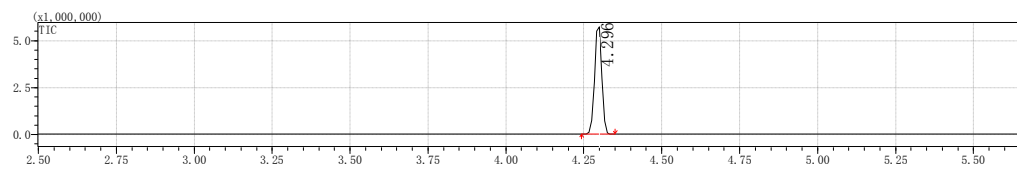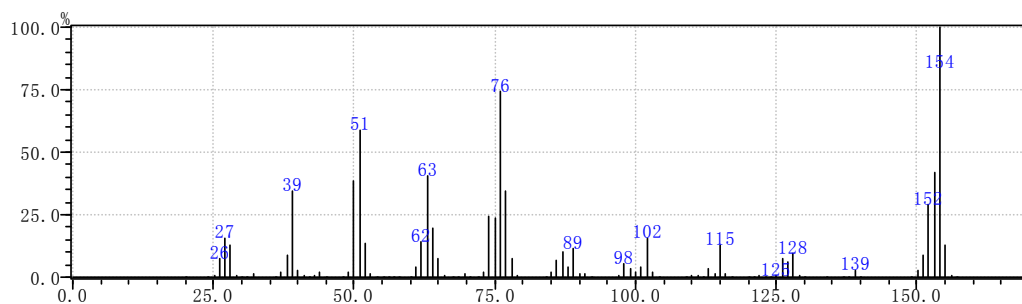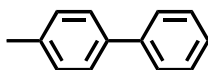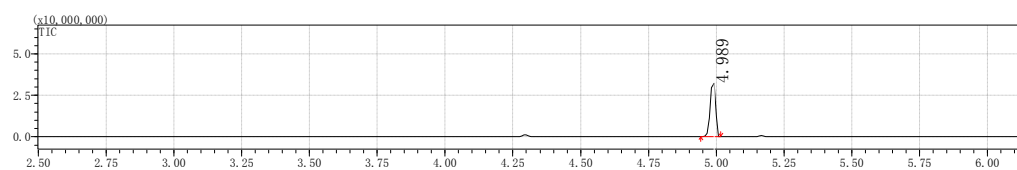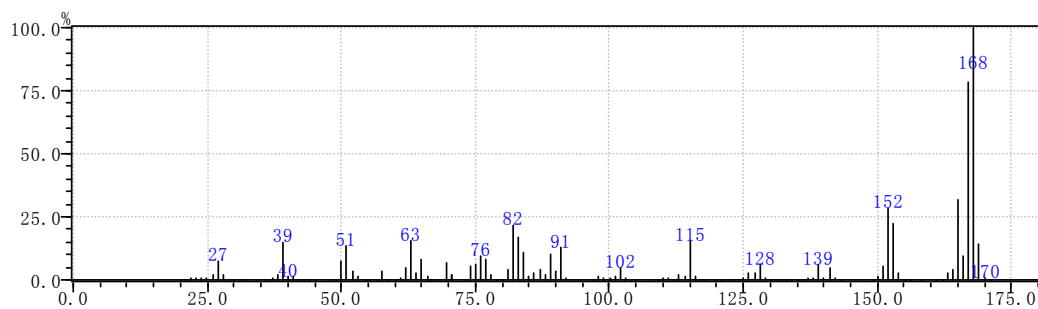

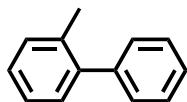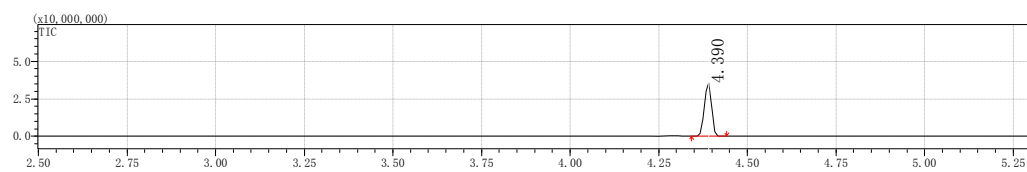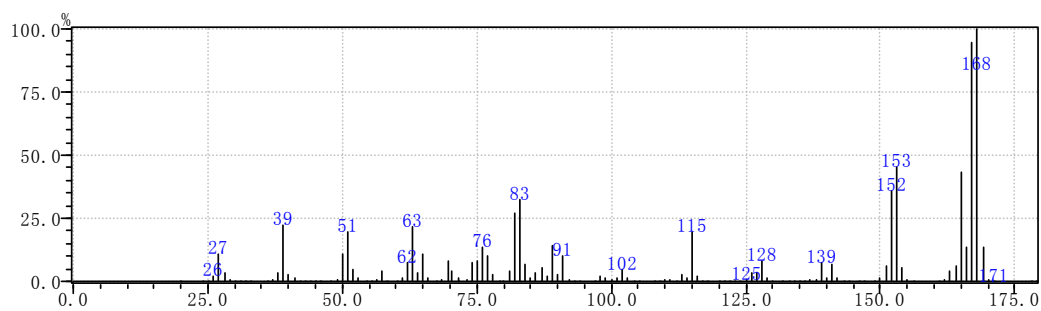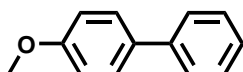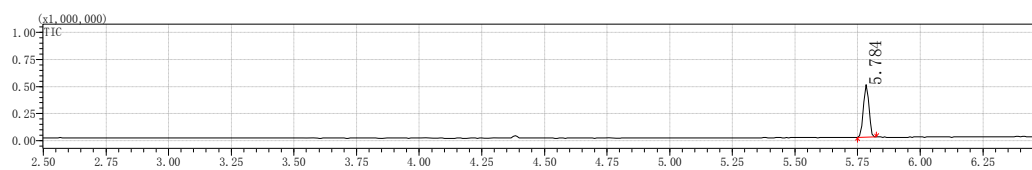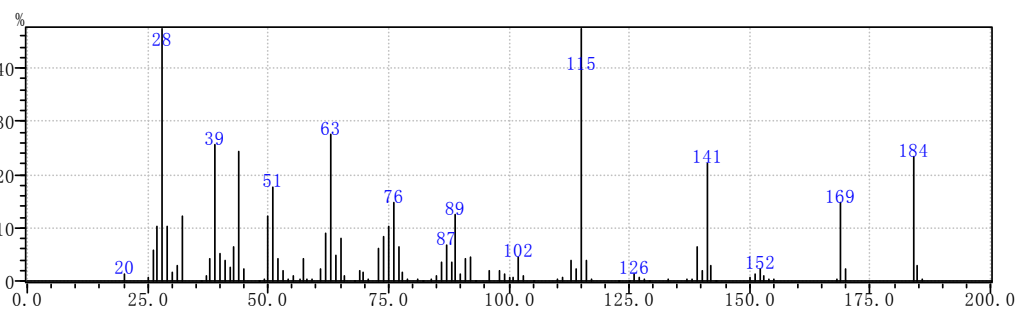

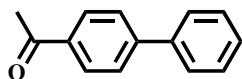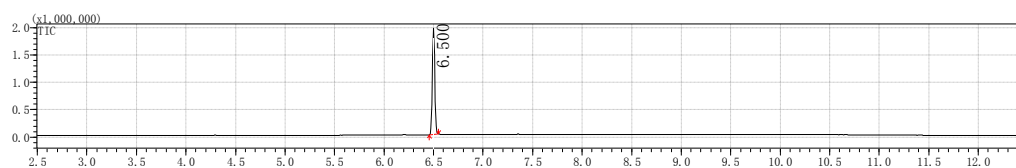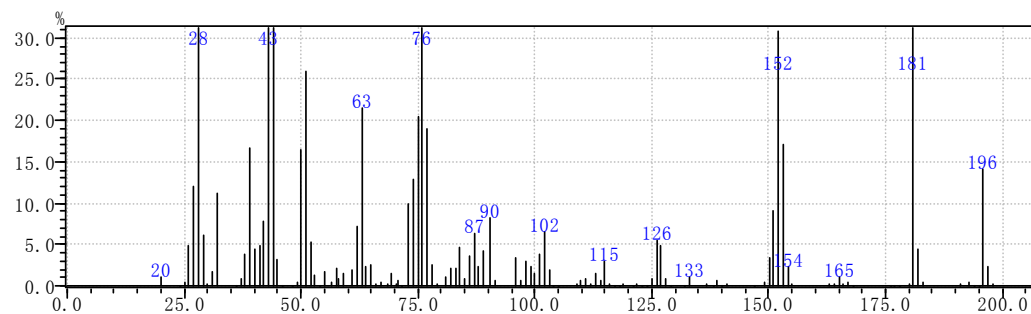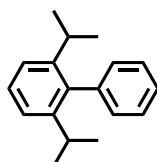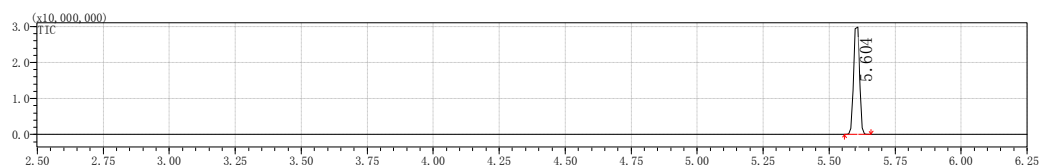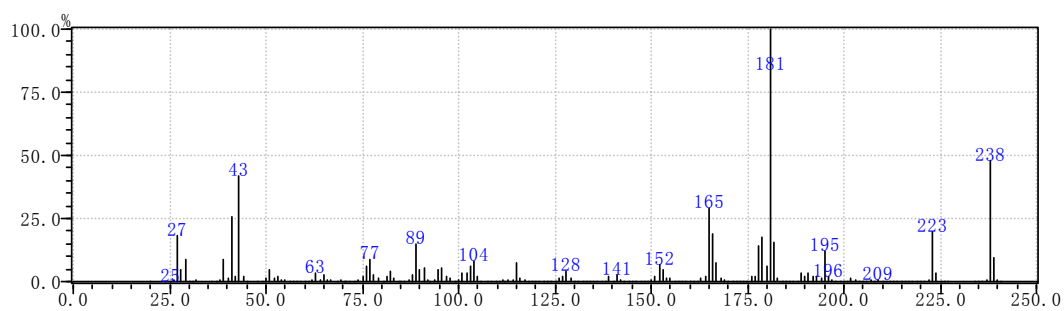



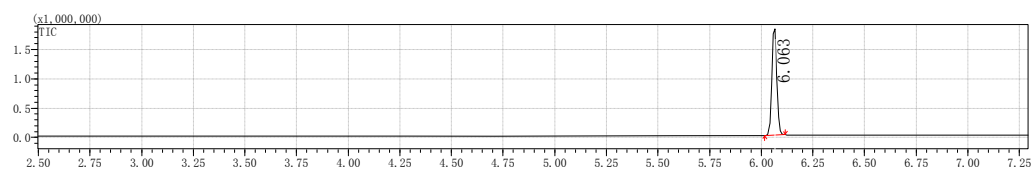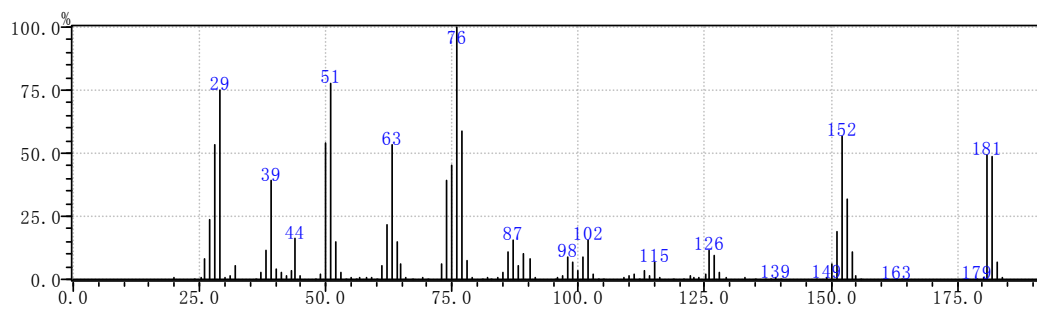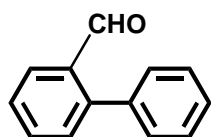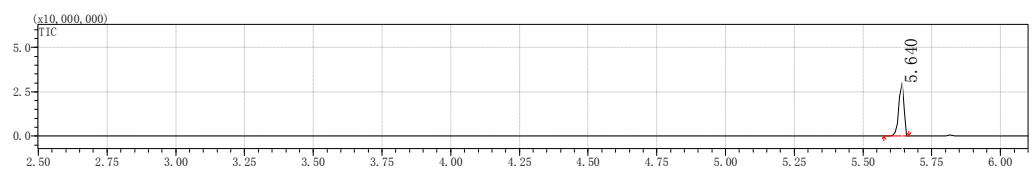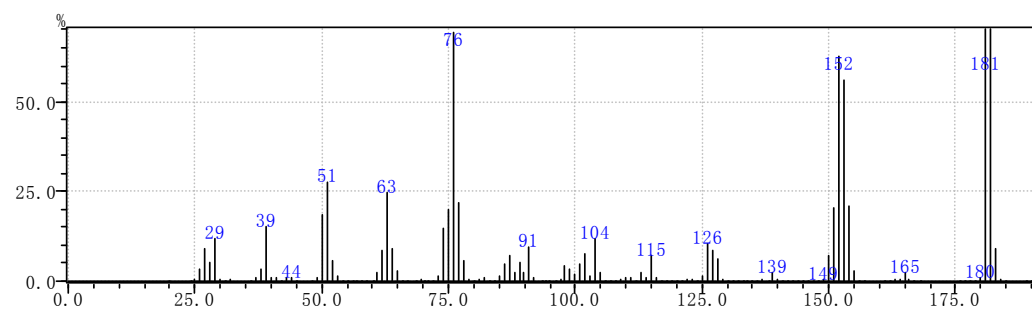

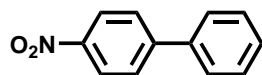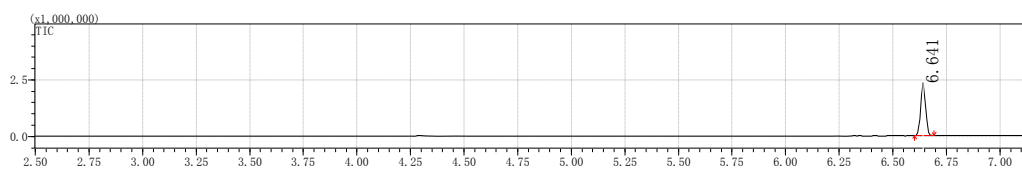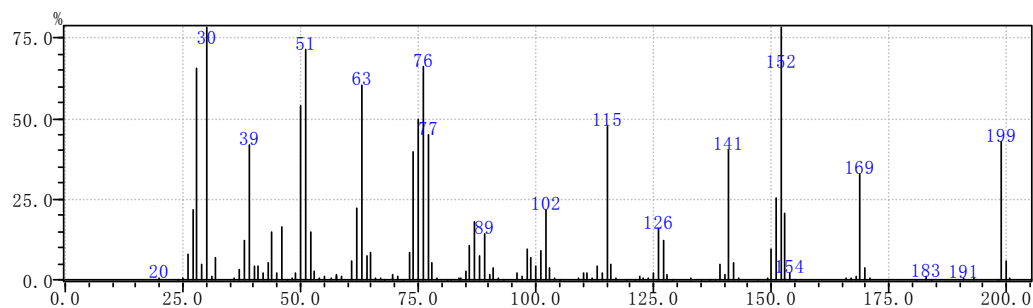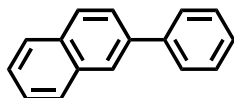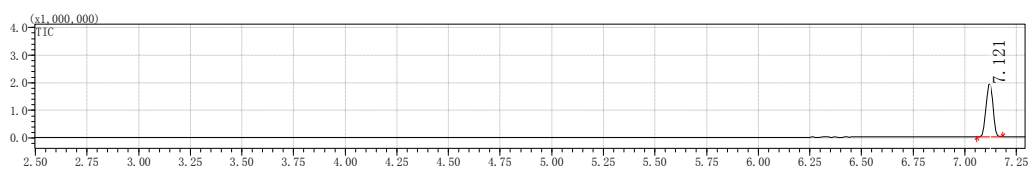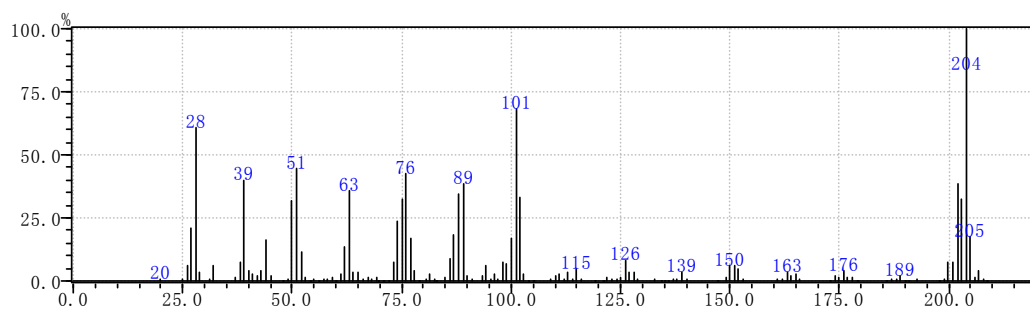

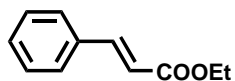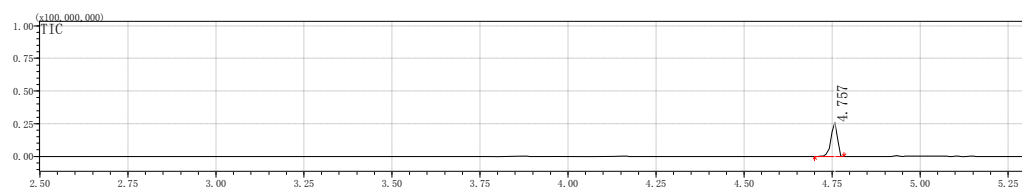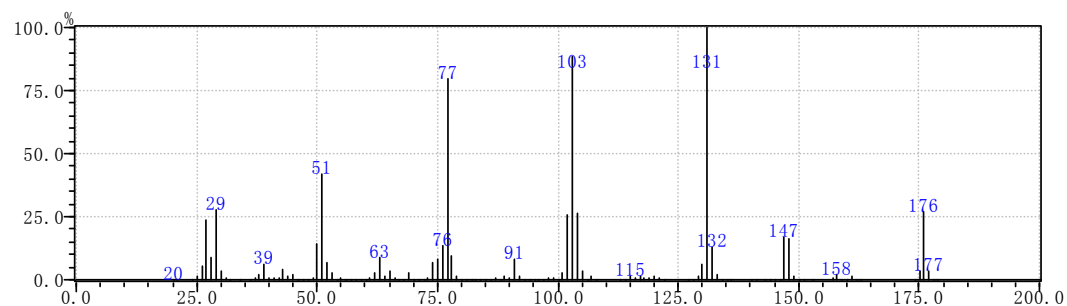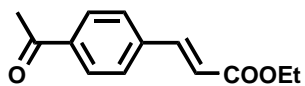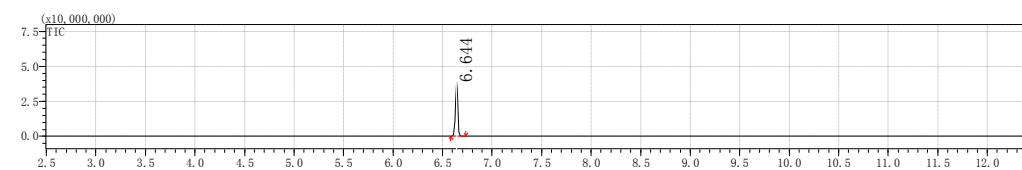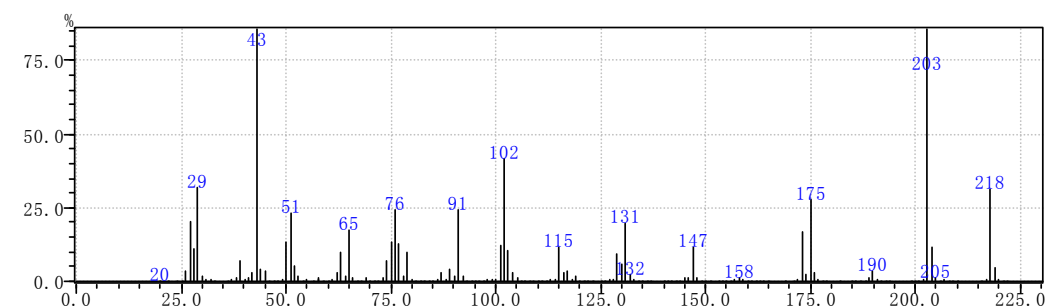

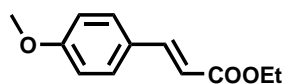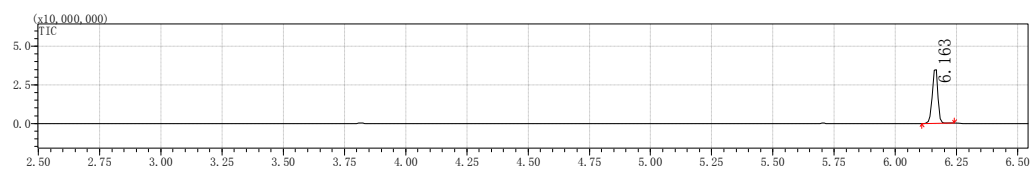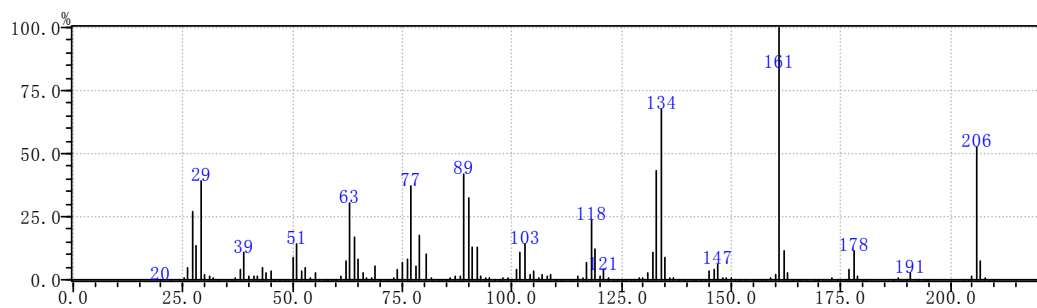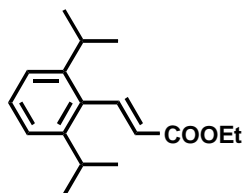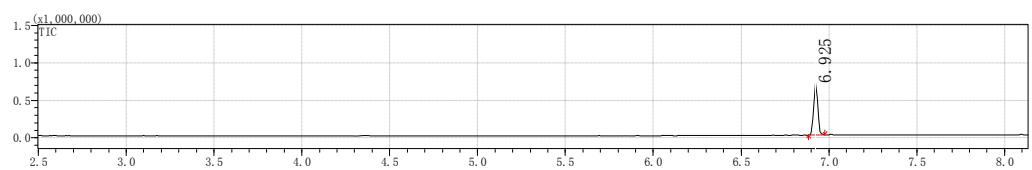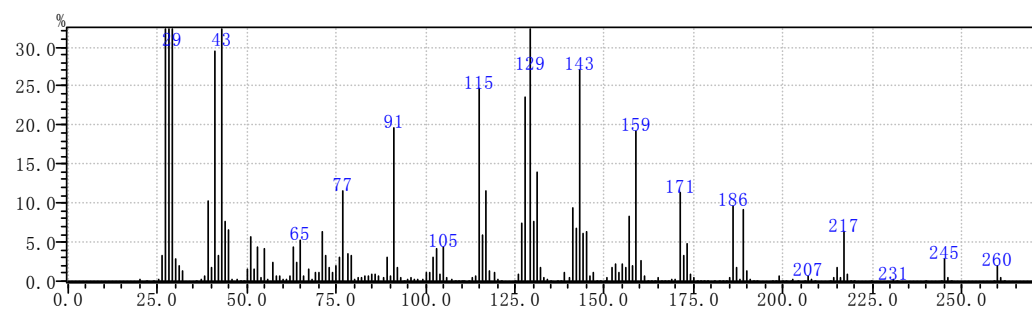

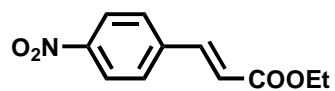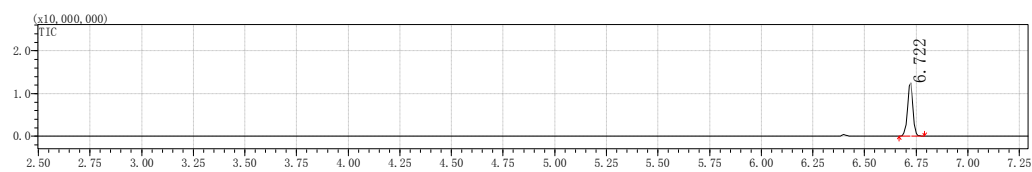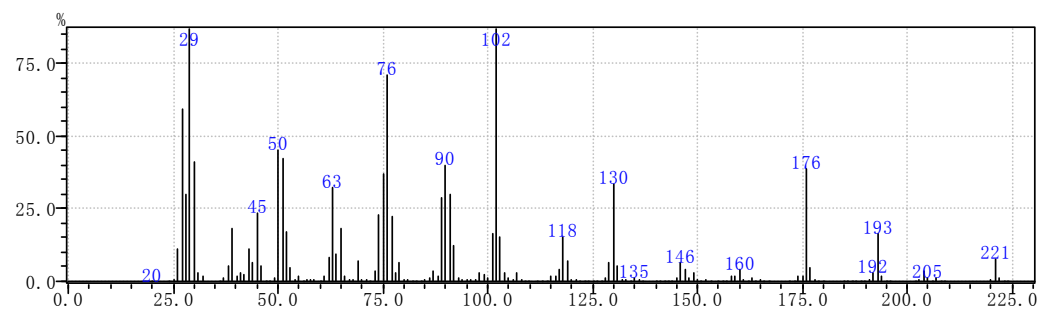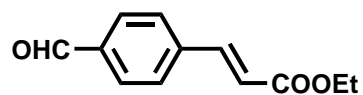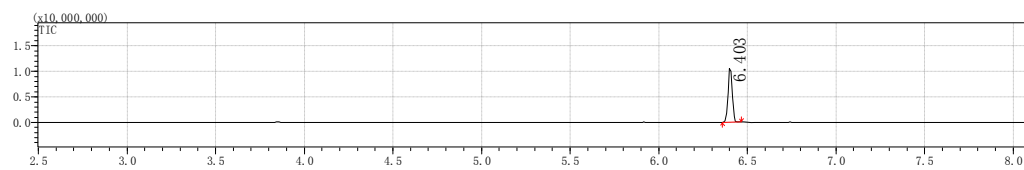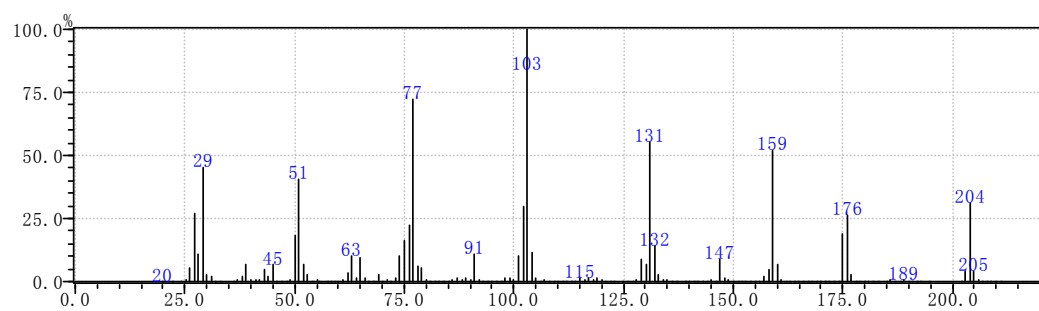

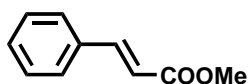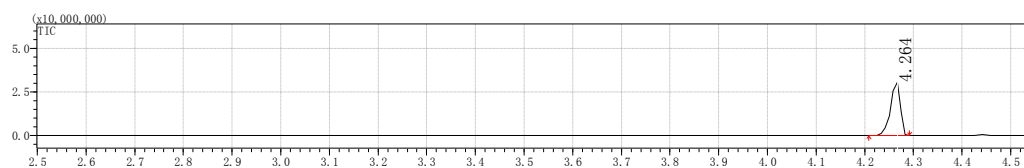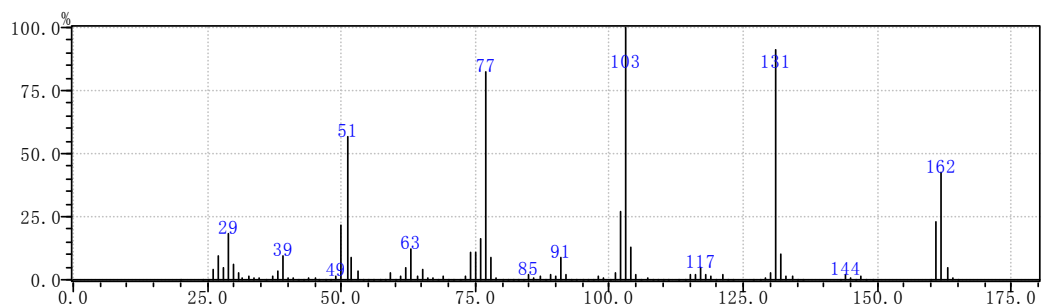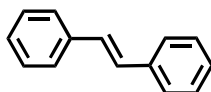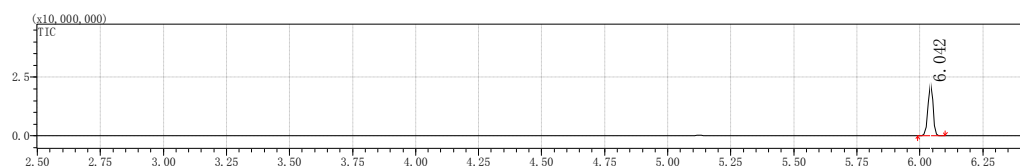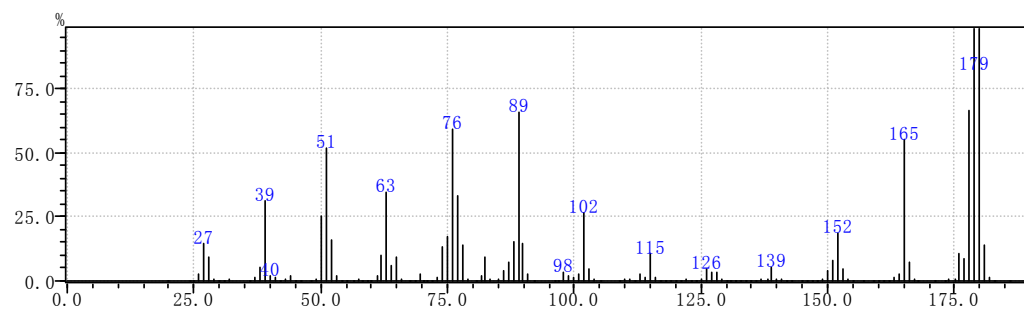

**Section L. Supporting references**

1. B. Lin and J. X. Wang, *Adv. Synth. Catal.*, 2008, **350**, 315-320.
2. E. Alacid and C. Nájera, *Org. Lett.*, 2008, **10**, 5011-5014.
3. V. K. Aggarwal, J. R. Fulton, C. G. Sheldon and J. Vicente, *J. Am. Chem. Soc.*, **2003**, 125, 6034-6035.
4. H. Lebel and M. Davi, *Adv. Synth. Catal.*, 2008, **350**, 2352-2358.
5. H. J. Xu, Y. Q. Zhao and X. F. Zhou, *J. Org. Chem.*, 2011, **76**, 8036-8041.
6. M. Shi and H. X. Qian, *Tetrahedron* 2005, **61**, 4949-4955.
